# Supplementary material for: Metabolic profiling and pharmacokinetic studies of Baihu-Guizhi decoction in rats by UFLC-Q-TOF–MS/MS and UHPLC-Q-TRAP-MS/MS
Source: PubMed Central journal article supplement (PMC9531372; doi:10.1186/s13020-022-00665-w), 2022-10-04

Figure S1. The chemical structure and corresponding MS/MS spectrum of absorbed components *in vivo*.

**Chemical structure**

**Negative mode**

**Positive mode**

**P1 Arginine**

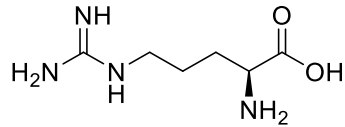

**ND**

Spectrum from 20200811-GZBHT-Serum...OF MS<sup>2</sup> (50 - 1500) from 1.844 min  
Precursor: 175.1 Da, CE: 30.0 CE=30

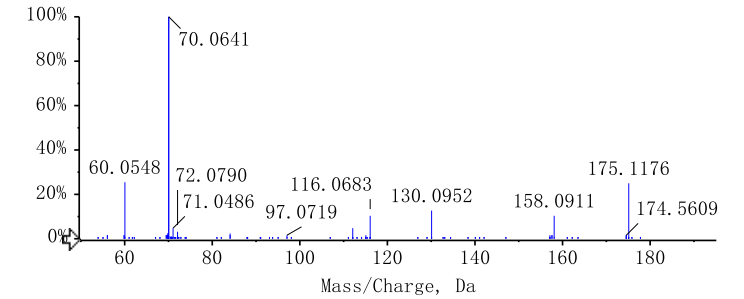

**P2 Citric acid**

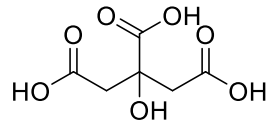

Spectrum from 20200811-GZBHT-Serum...OF MS<sup>2</sup> (50 - 1500) from 2.455 min  
Precursor: 191.0 Da CE=-30

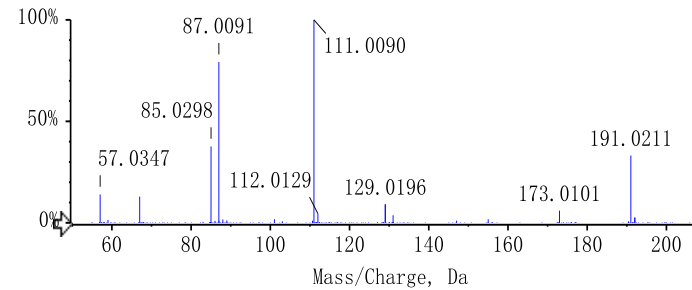

**ND**

**P3 Isoleucine**

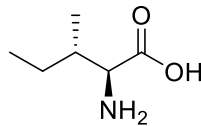

**ND**

Spectrum from 20200811-GZBHT-Serum...OF MS<sup>2</sup> (50 - 1500) from 2.429 min  
Precursor: 132.1 Da, CE: 30.0 CE=30

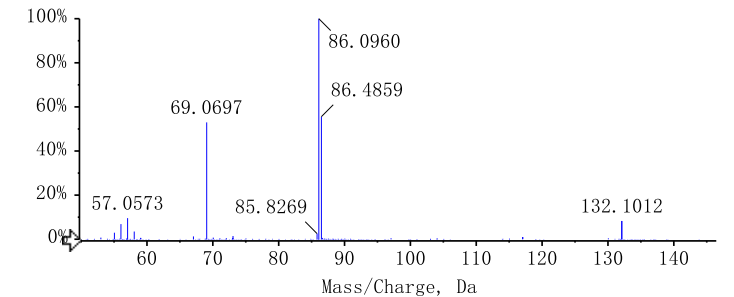

Figure S1. The chemical structure and corresponding MS/MS spectrum of absorbed components *in vivo*.

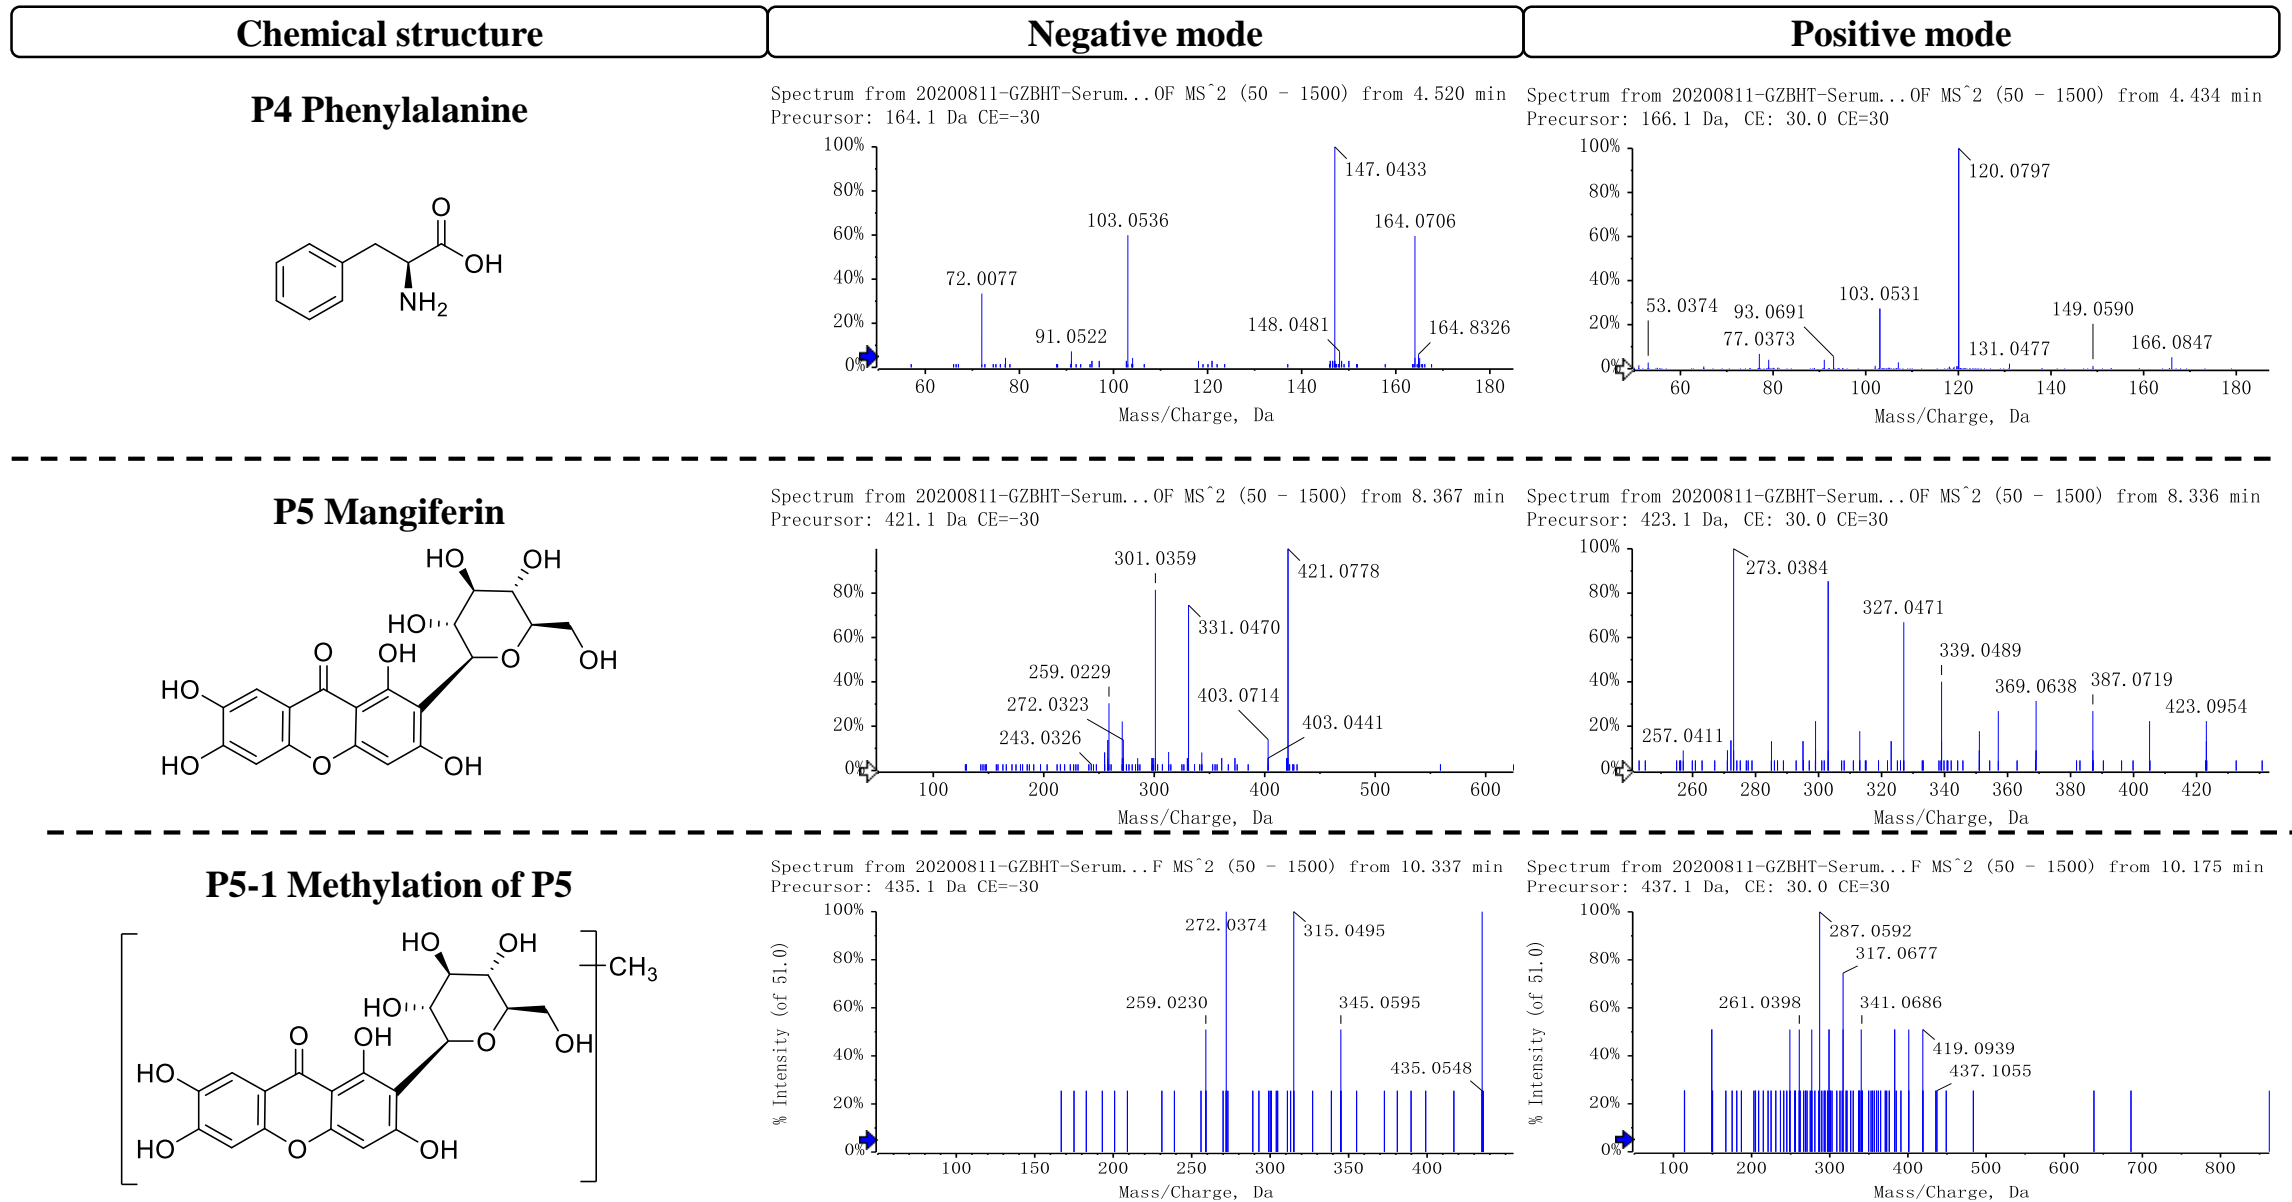

Figure S1. The chemical structure and corresponding MS/MS spectrum of absorbed components *in vivo*.

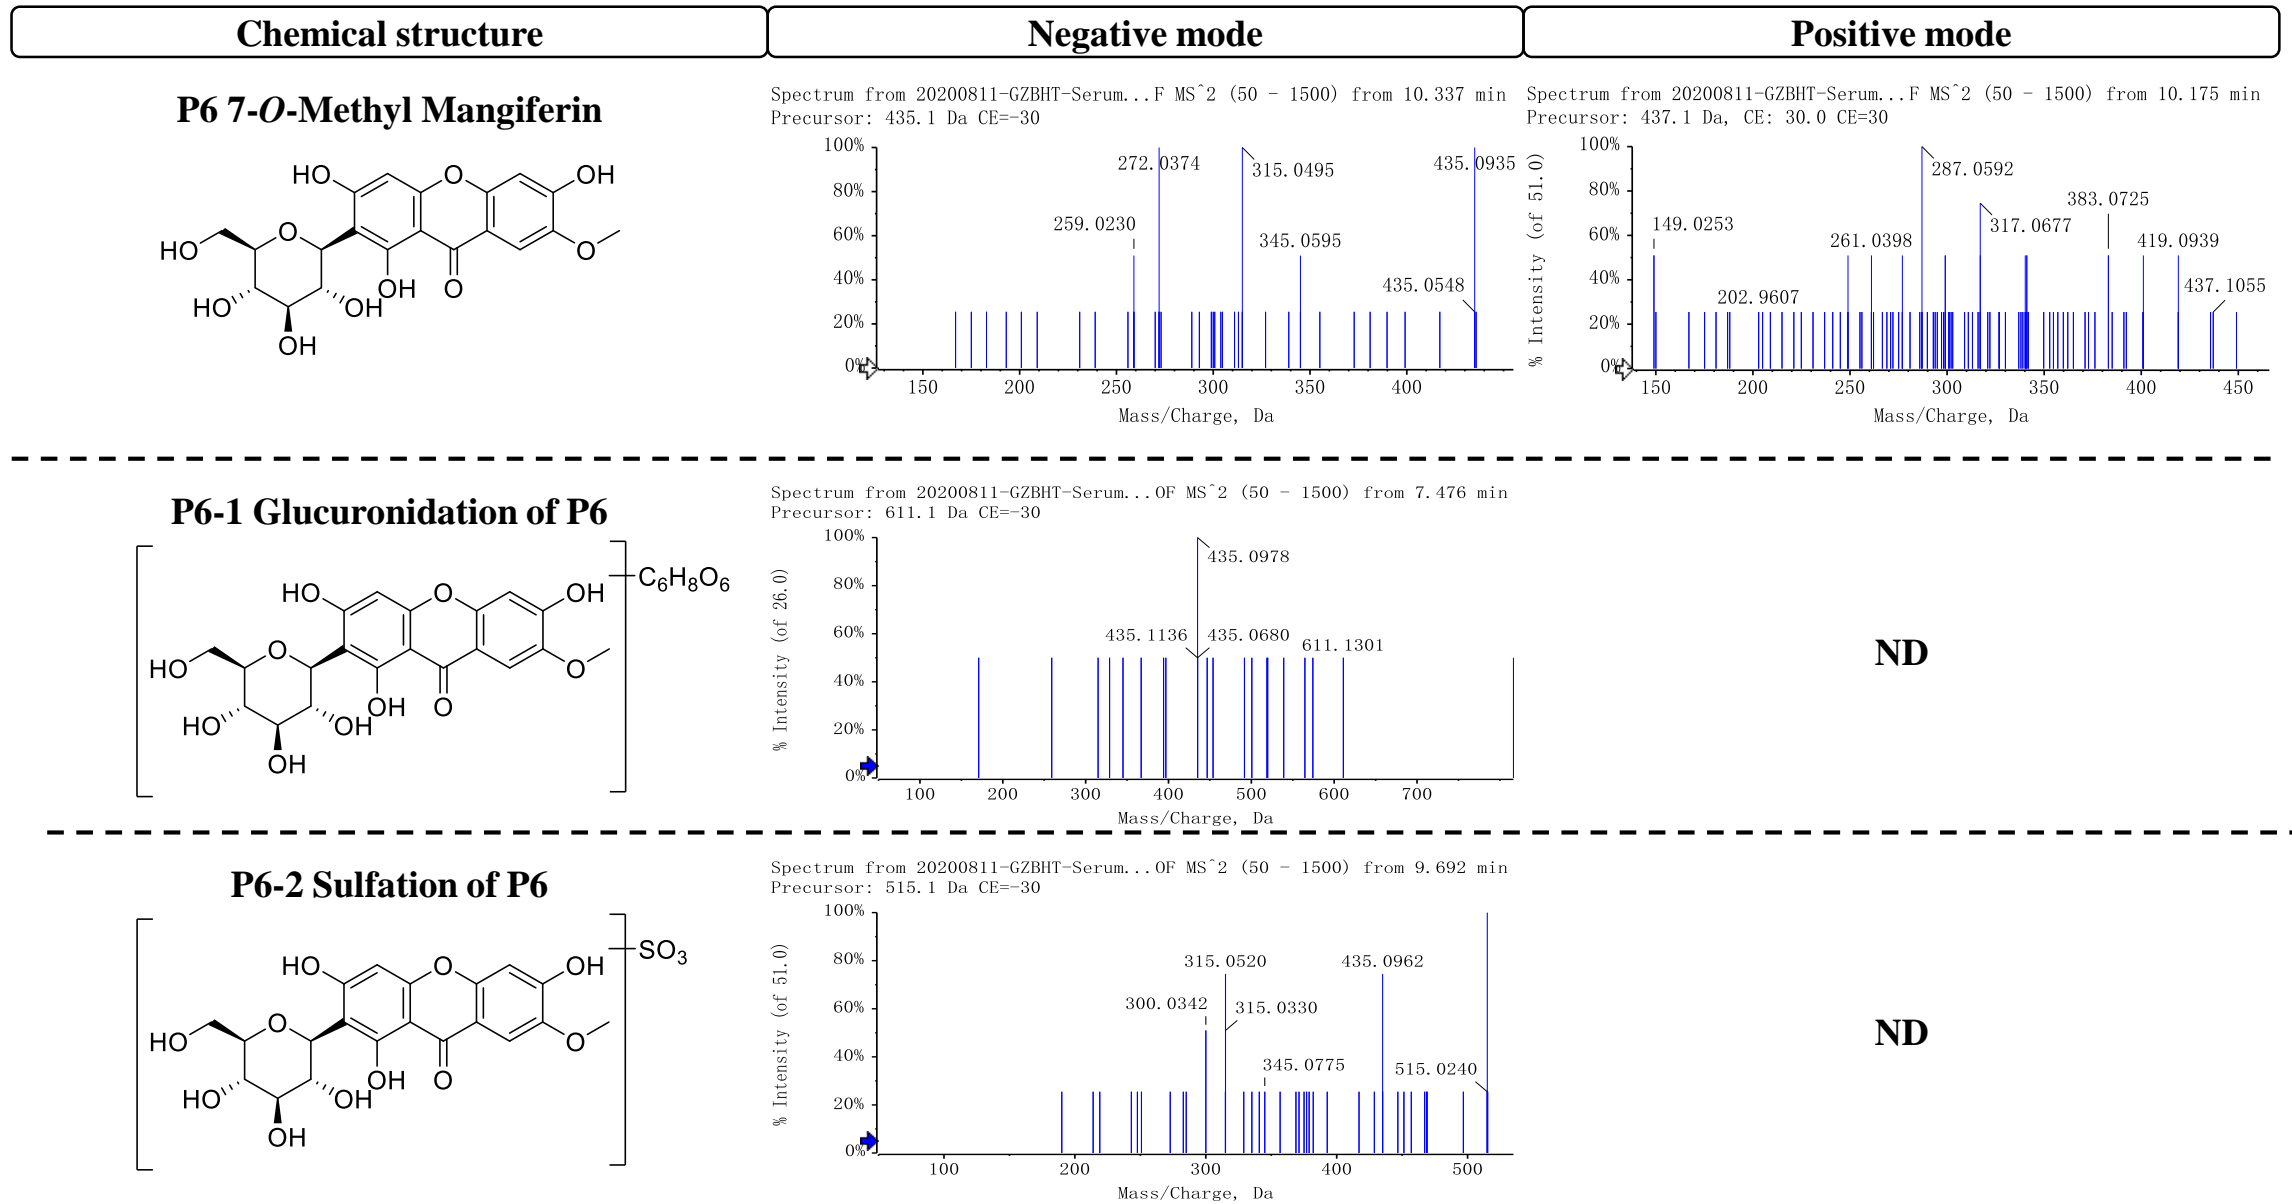

Figure S1. The chemical structure and corresponding MS/MS spectrum of absorbed components *in vivo*.

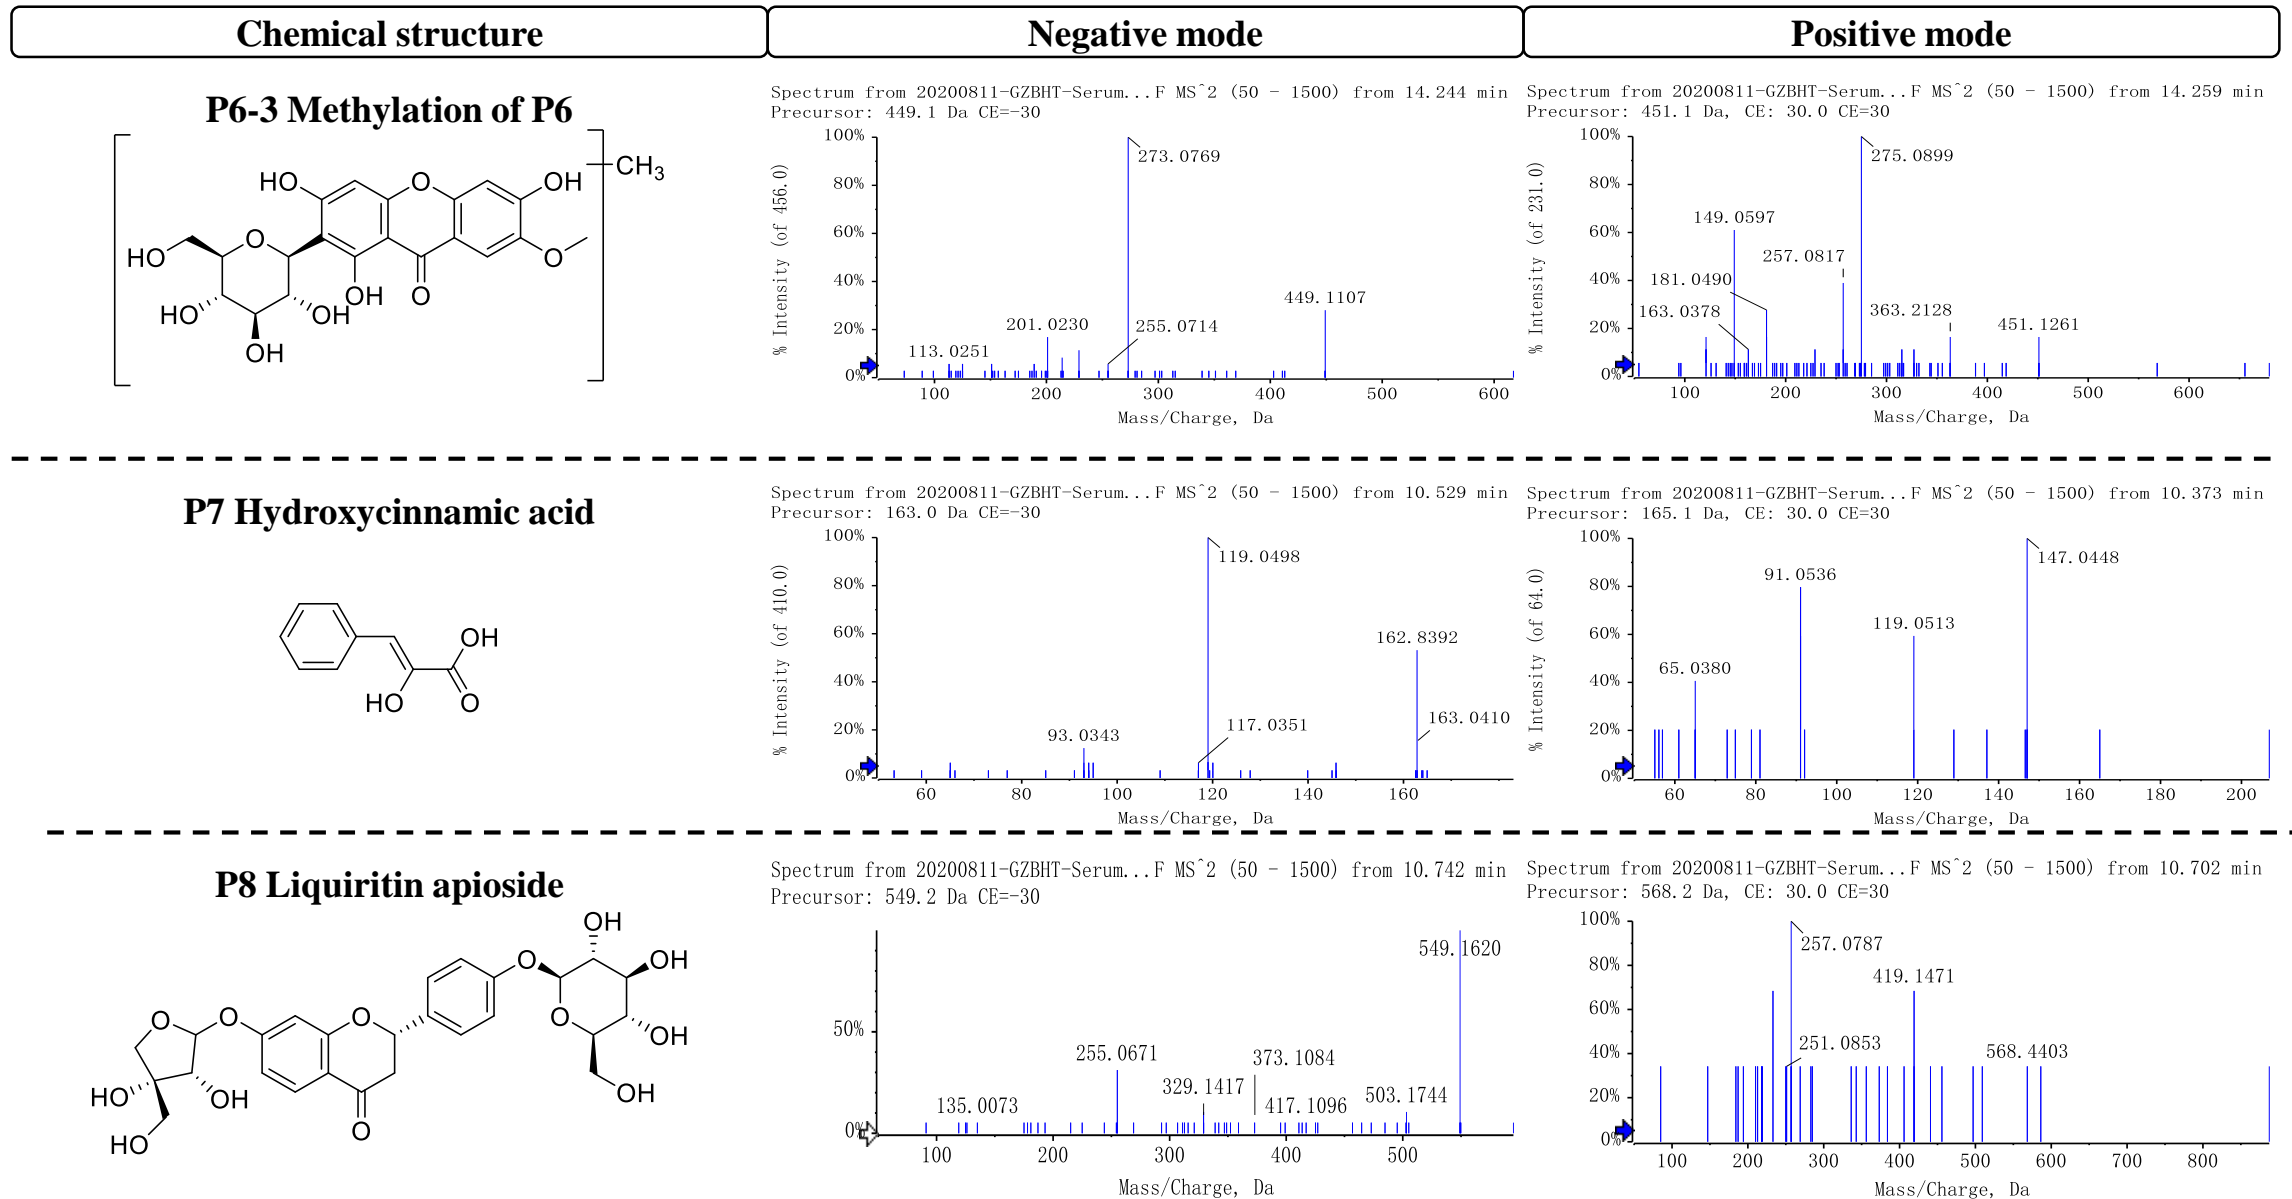

Figure S1. The chemical structure and corresponding MS/MS spectrum of absorbed components *in vivo*.

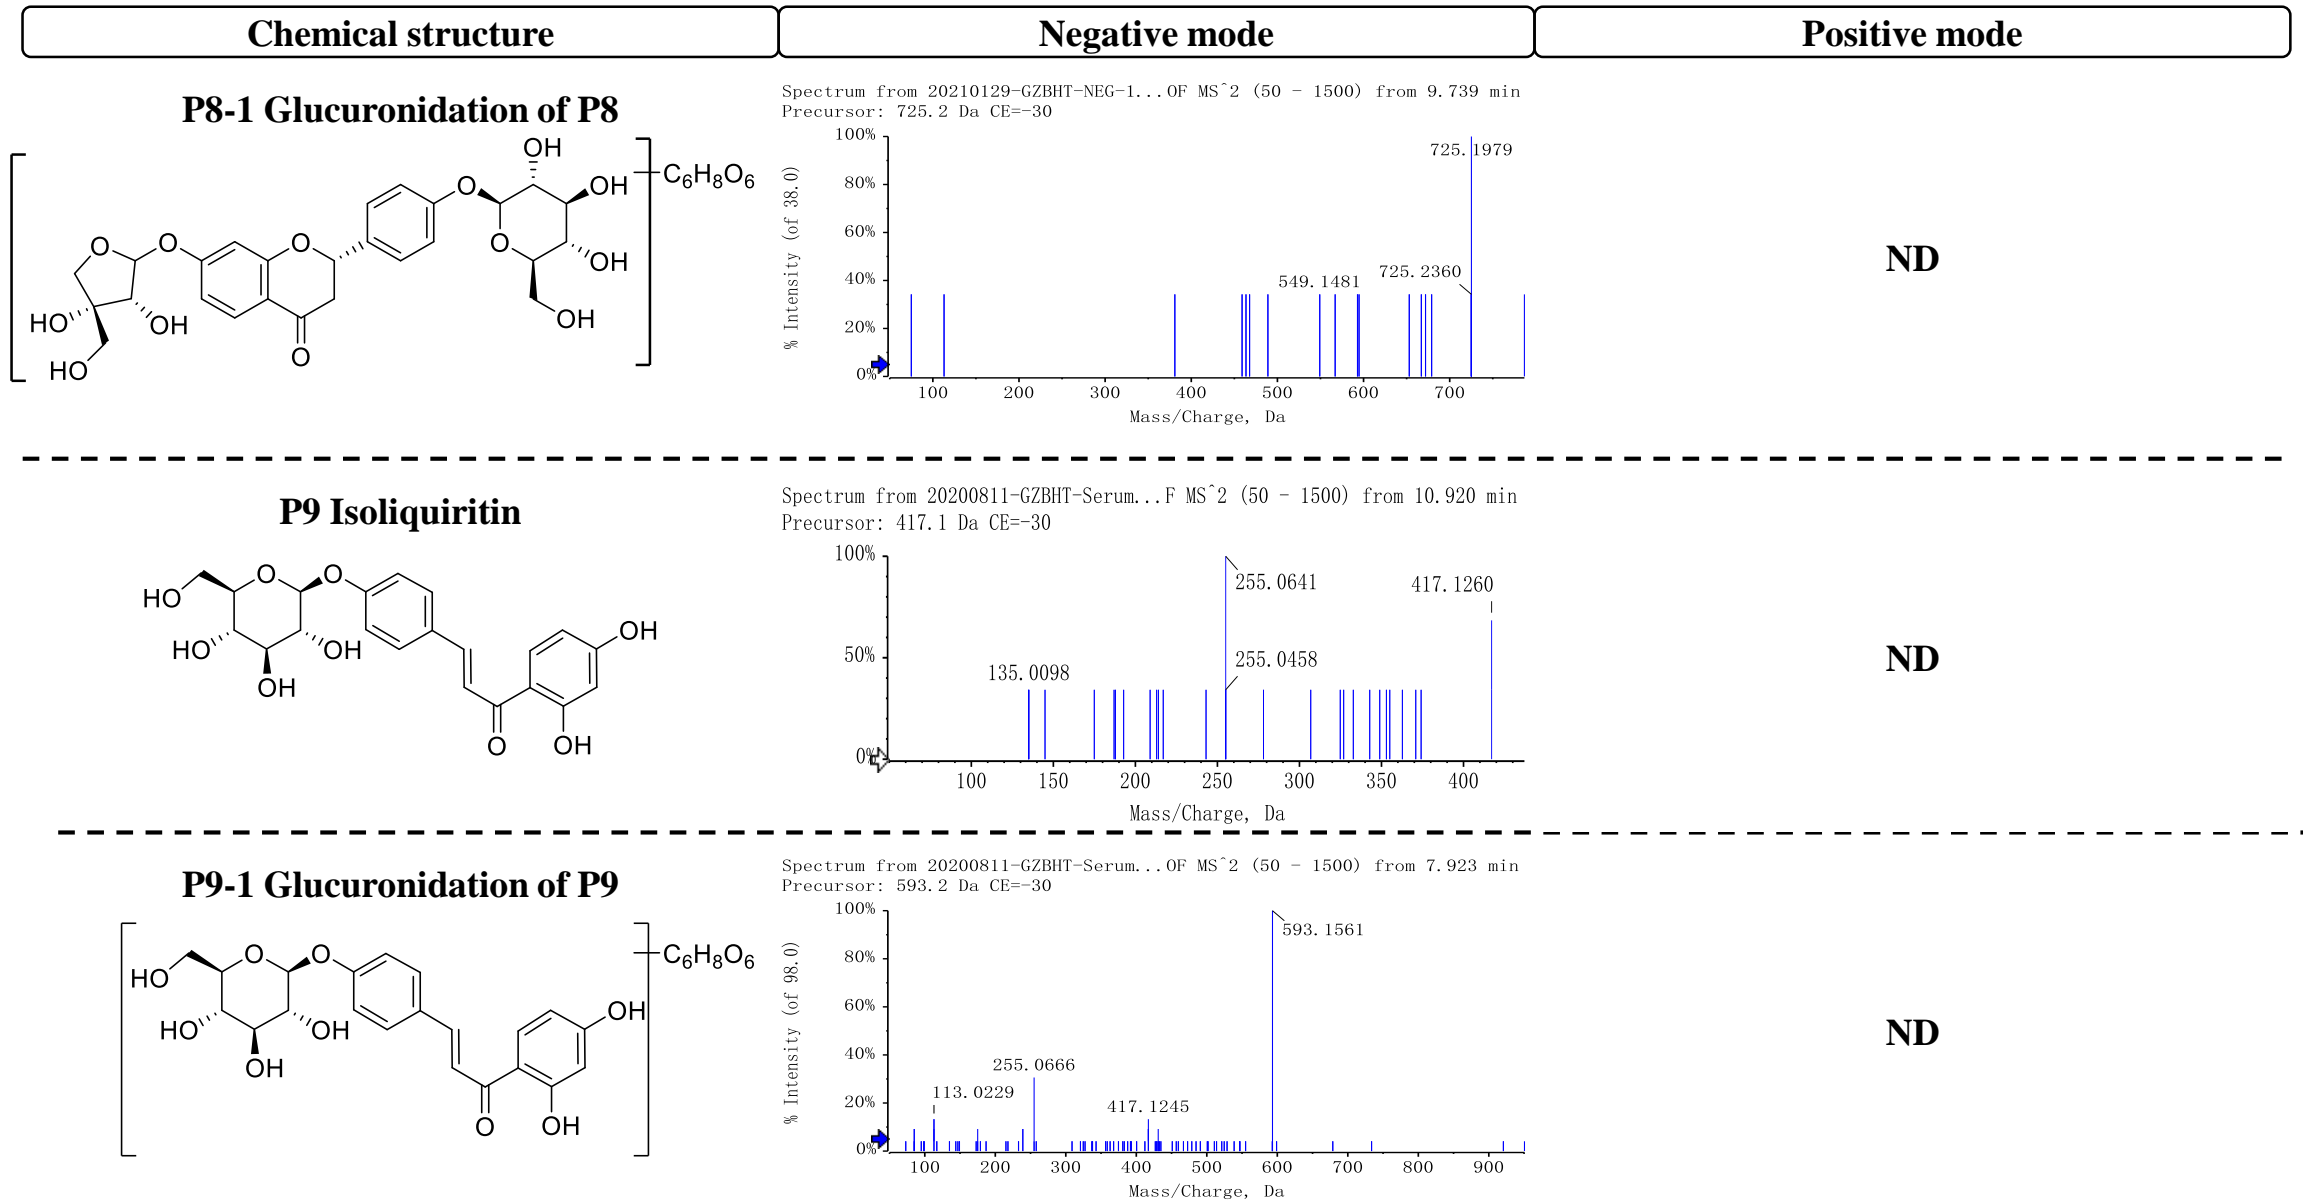

Figure S1. The chemical structure and corresponding MS/MS spectrum of absorbed components *in vivo*.

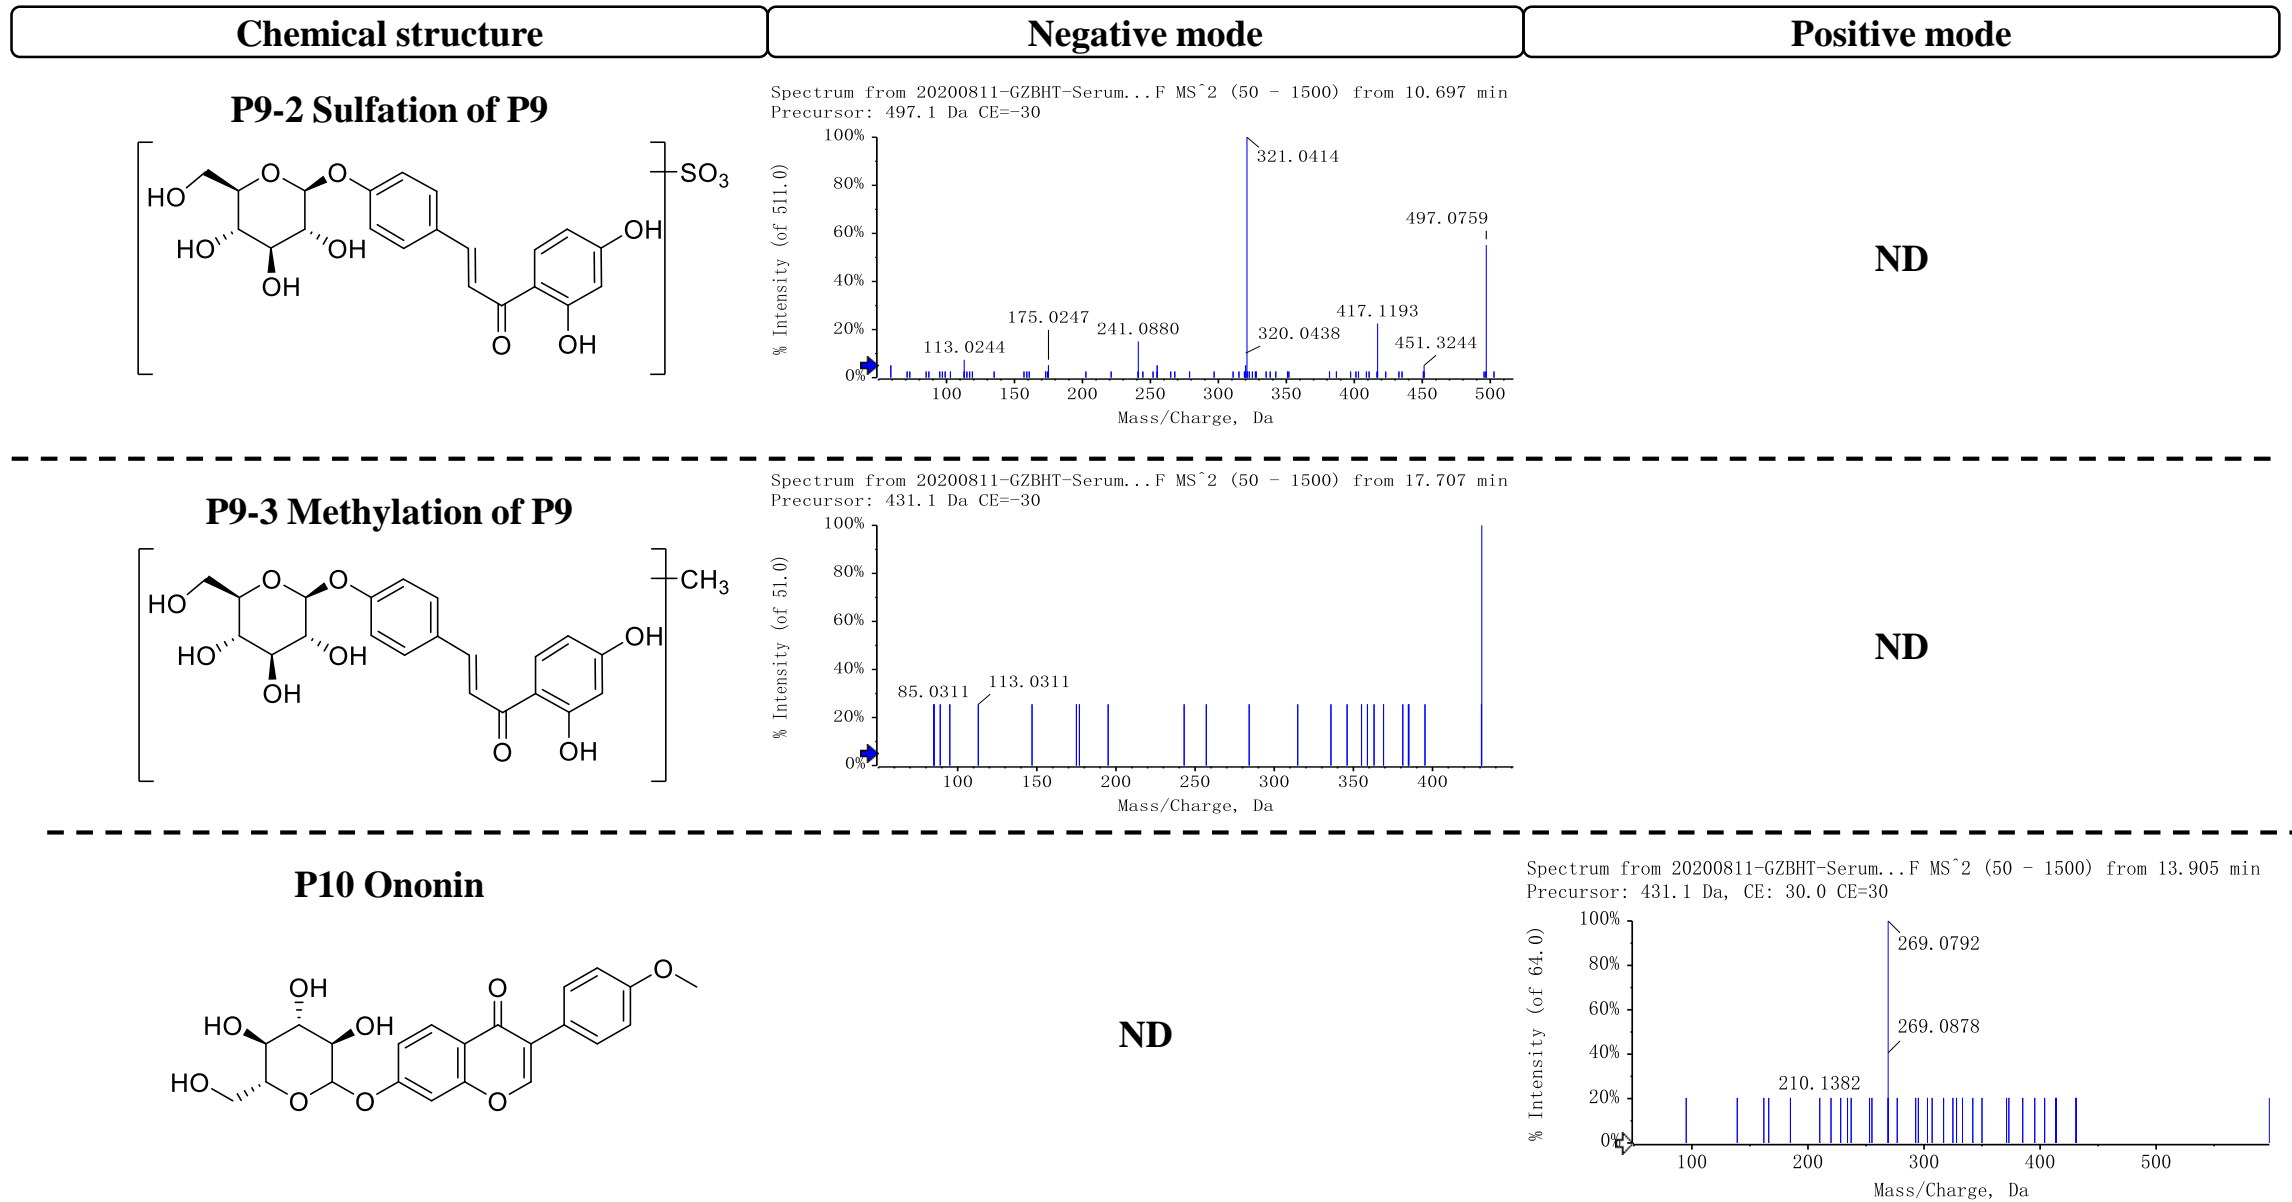

Figure S1. The chemical structure and corresponding MS/MS spectrum of absorbed components *in vivo*.

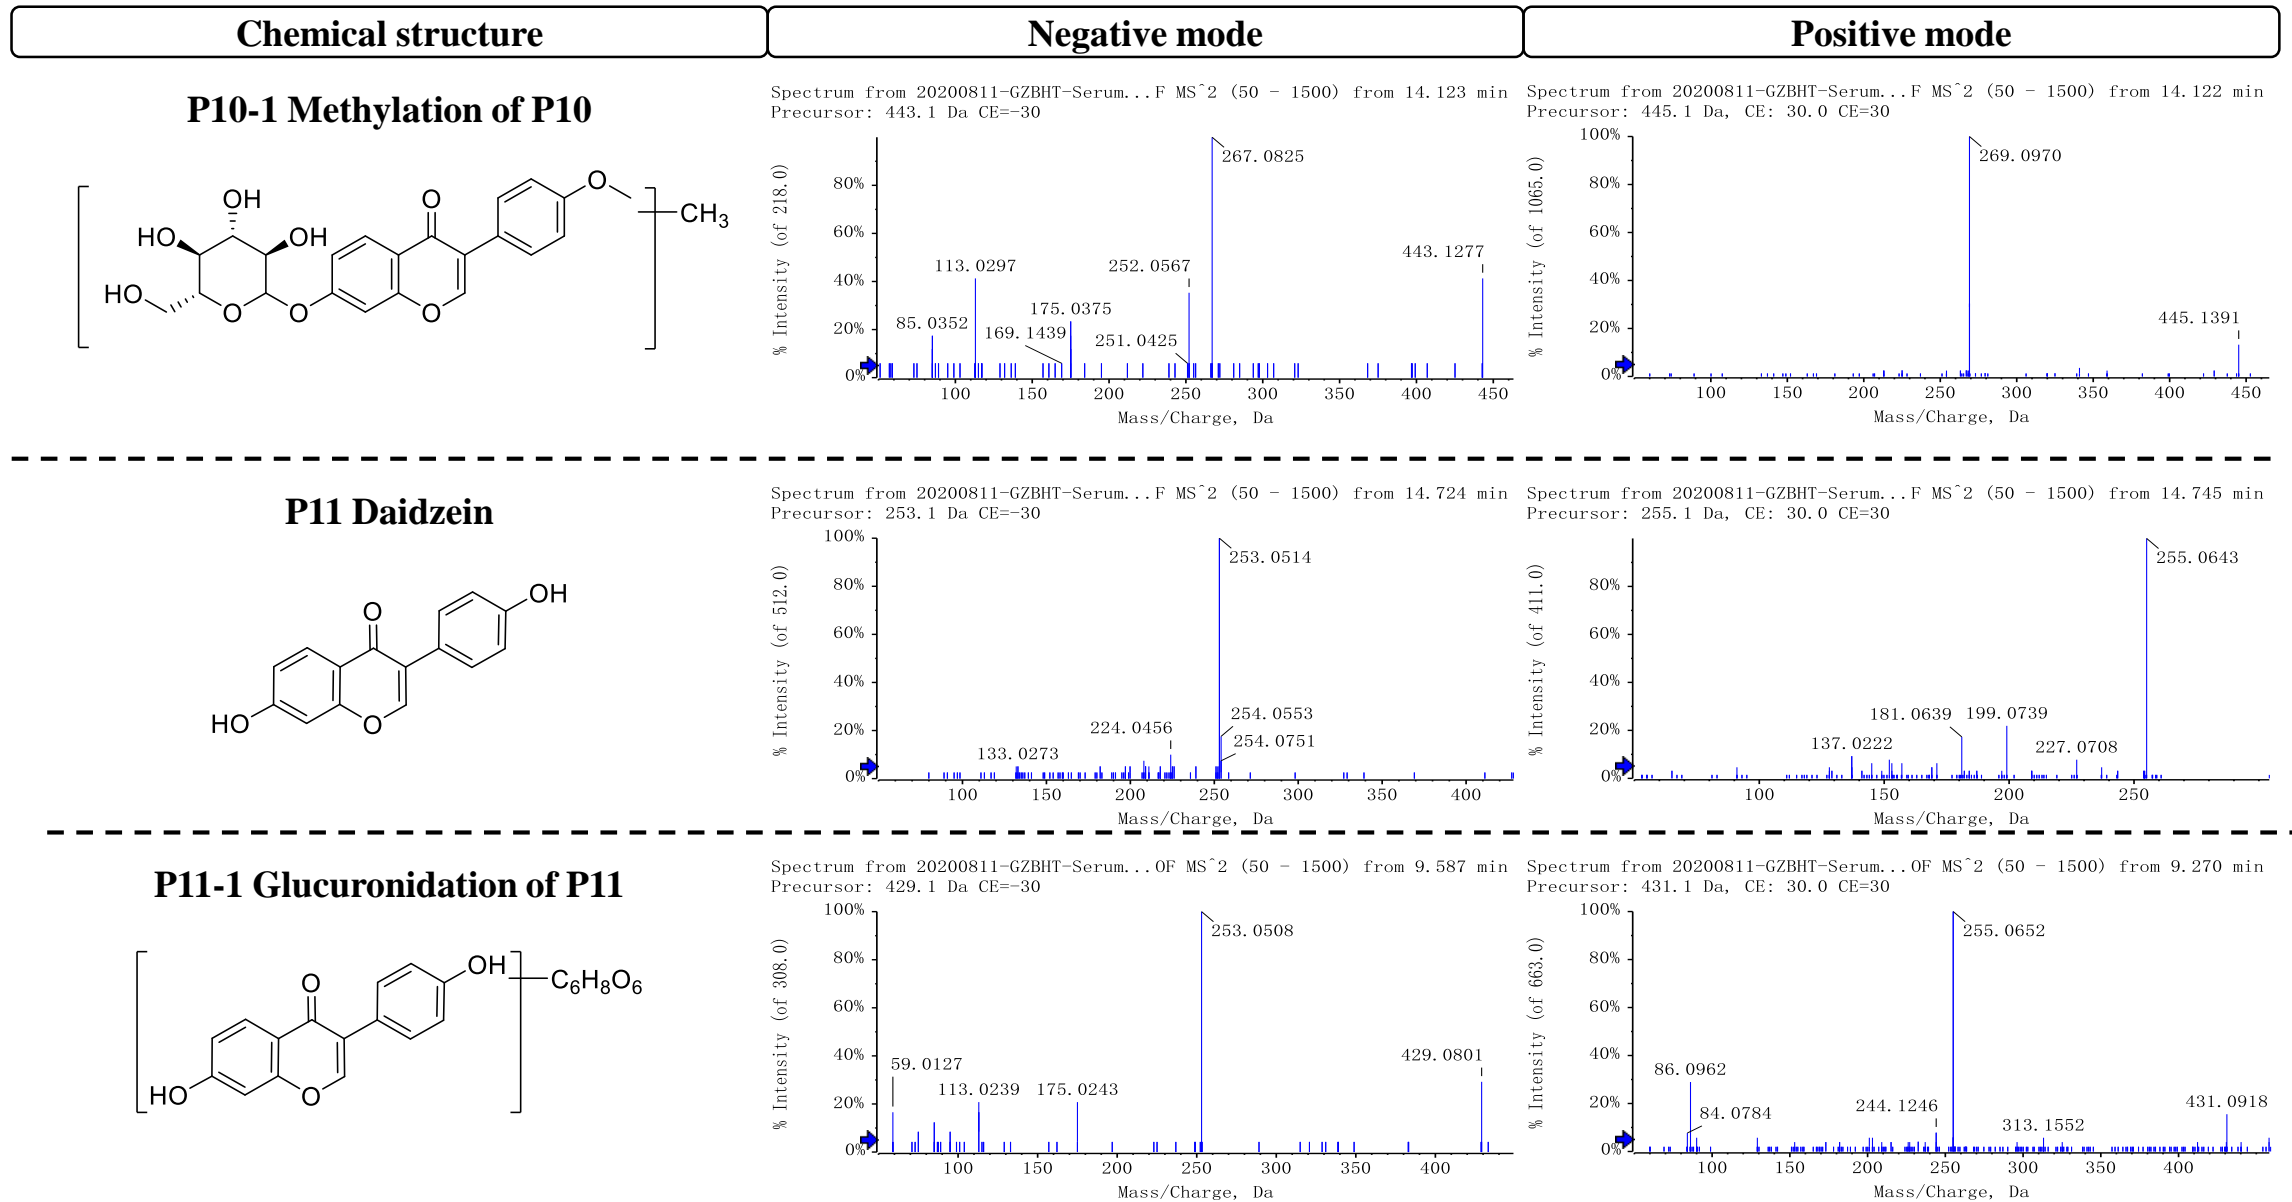

Figure S1. The chemical structure and corresponding MS/MS spectrum of absorbed components *in vivo*.

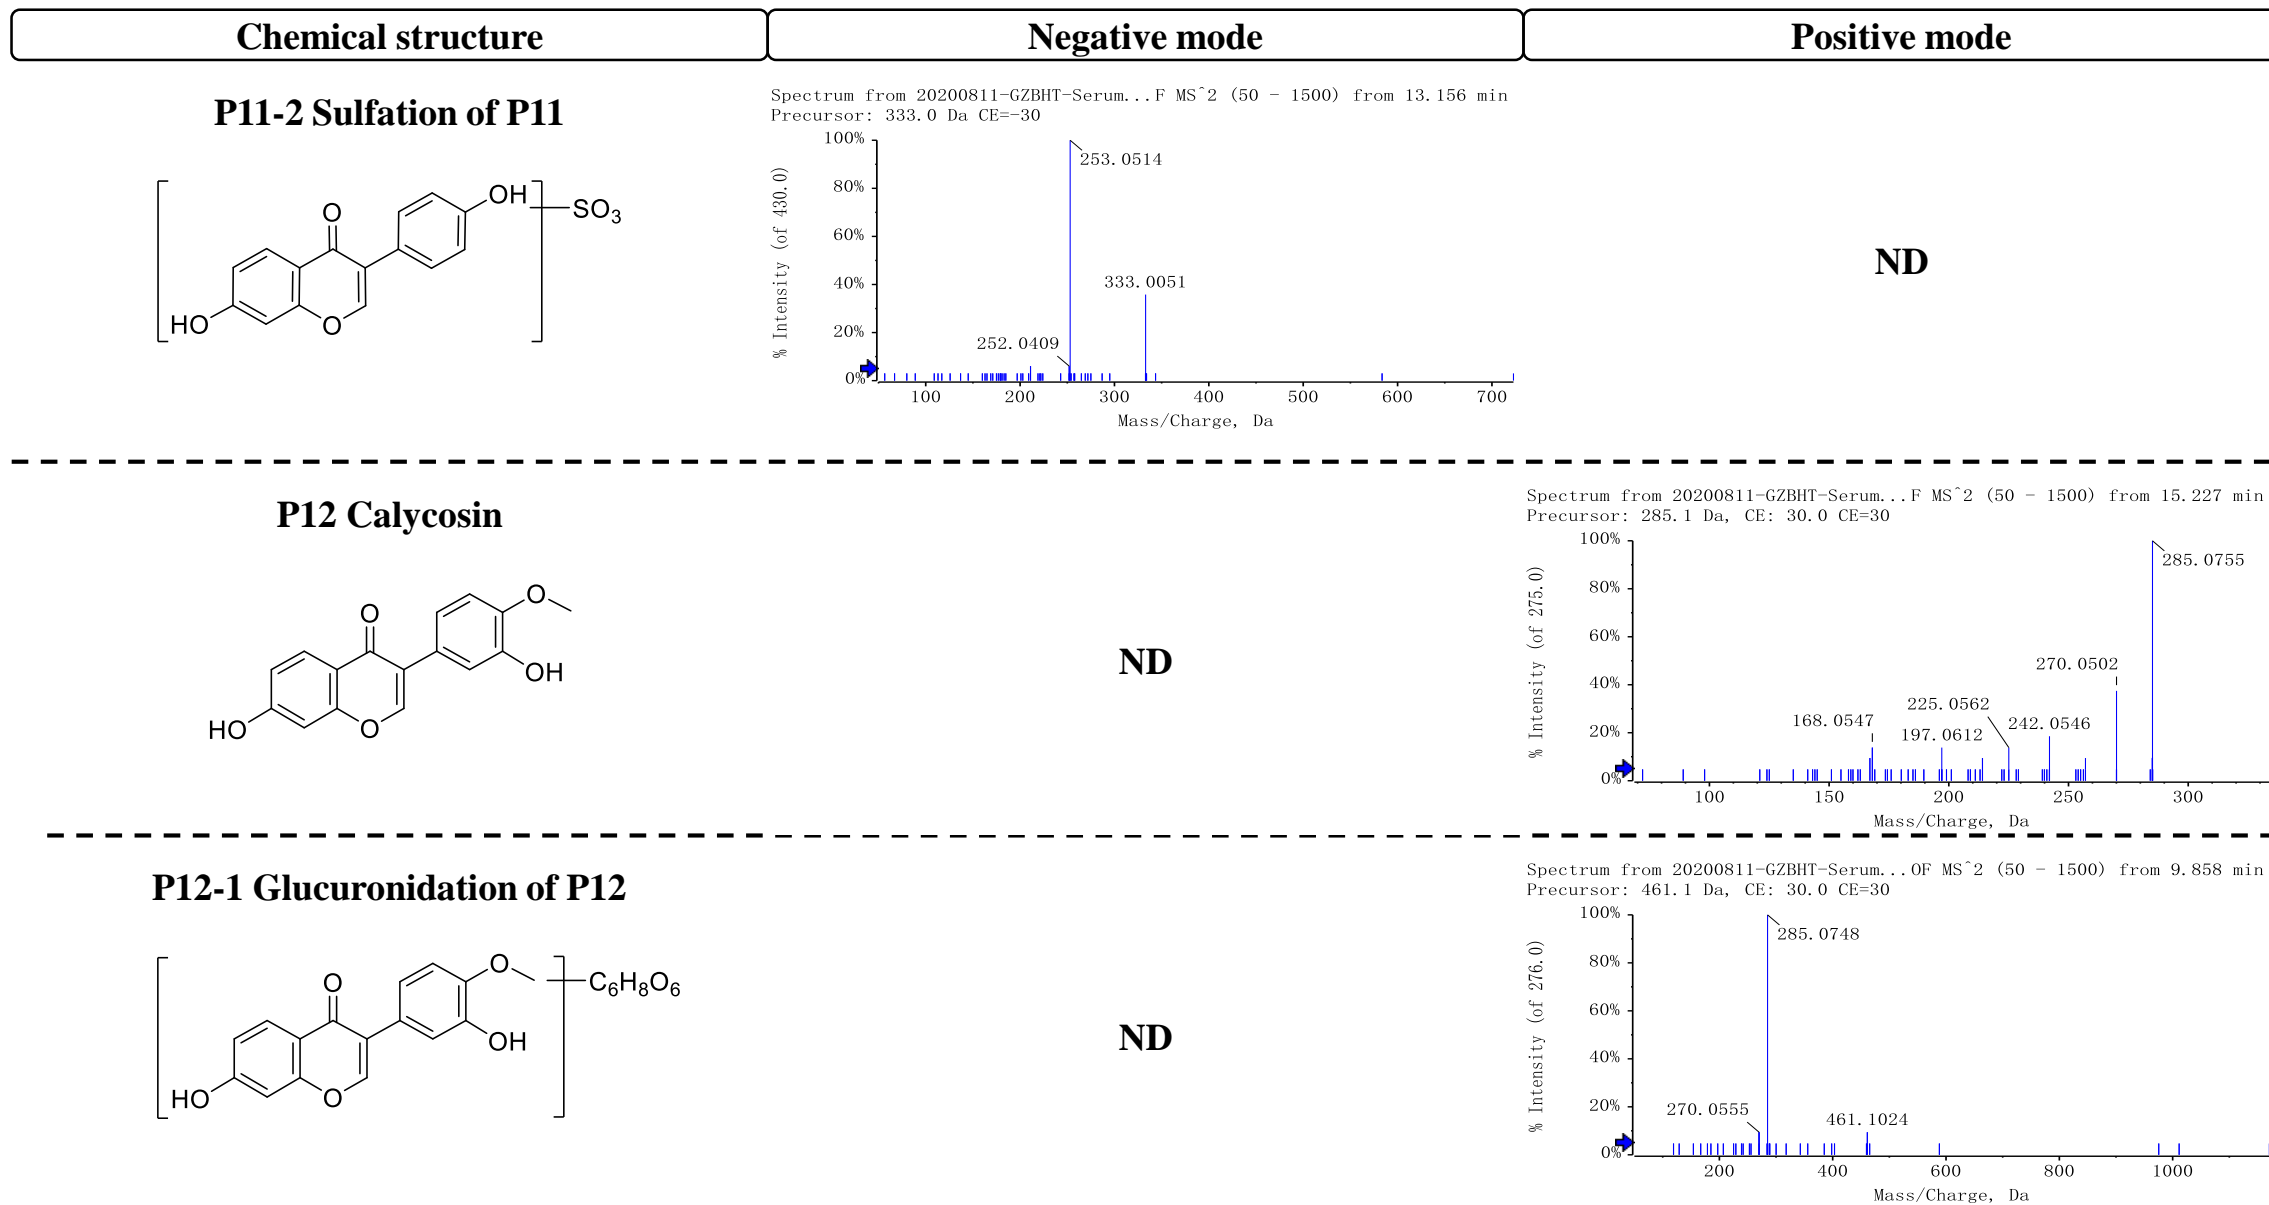



Figure S1. The chemical structure and corresponding MS/MS spectrum of absorbed components *in vivo*.

**Chemical structure**

**Negative mode**

**Positive mode**

**P13 Cinnamic acid**

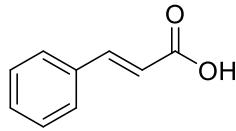

Spectrum from 20200811-GZBHT-Serum...F MS<sup>2</sup> (50 - 1500) from 16.358 min  
Precursor: 147.1 Da CE=-30

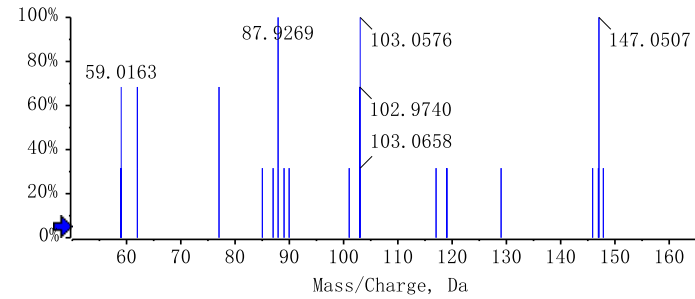

Spectrum from 20200811-GZBHT-Serum...F MS<sup>2</sup> (50 - 1500) from 16.358 min  
Precursor: 149.1 Da, CE: 30.0 CE=30

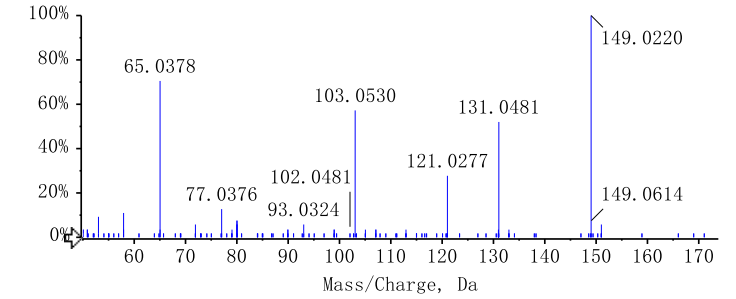

**P14 Timosaponin BIII**

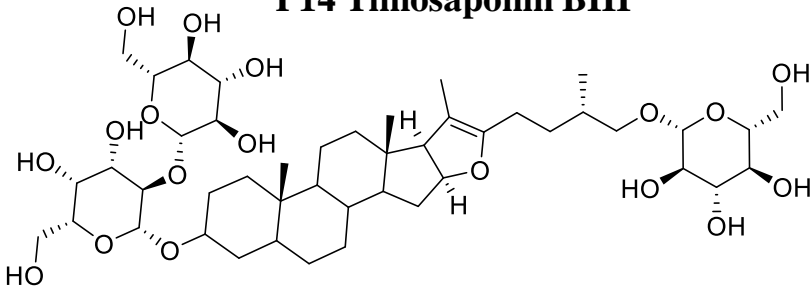

Spectrum from 20200811-GZBHT-Serum...F MS<sup>2</sup> (50 - 1500) from 16.974 min  
Precursor: 901.5 Da CE=-30

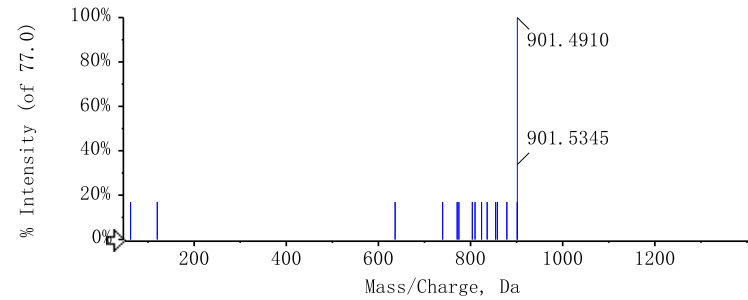

Spectrum from 20200811-GZBHT-Serum...F MS<sup>2</sup> (50 - 1500) from 16.936 min  
Precursor: 903.5 Da, CE: 30.0 CE=30

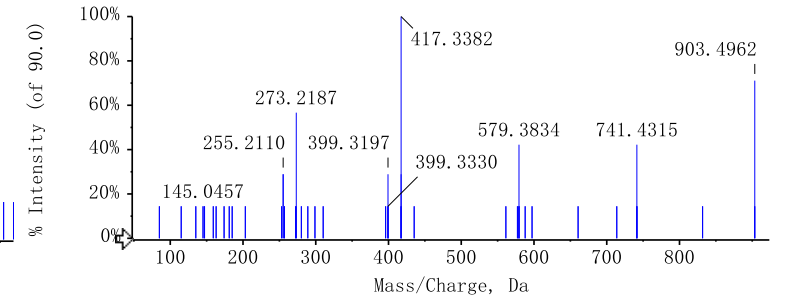

**P15 3',4',7-Trihydroxyisoflavan**

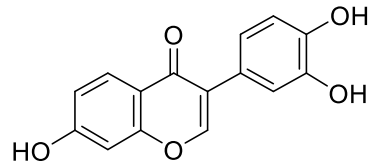

Spectrum from 20200811-GZBHT-Serum...F MS<sup>2</sup> (50 - 1500) from 17.574 min  
Precursor: 269.0 Da CE=-30

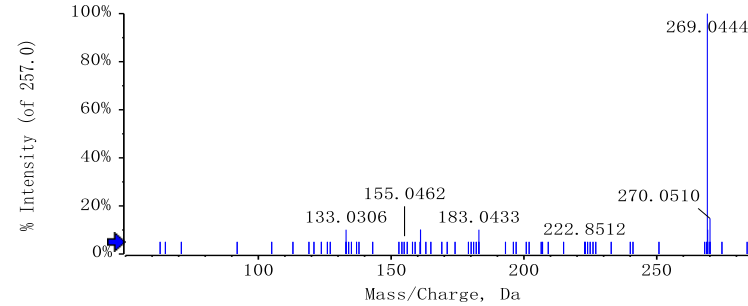

**ND**

Figure S1. The chemical structure and corresponding MS/MS spectrum of absorbed components *in vivo*.

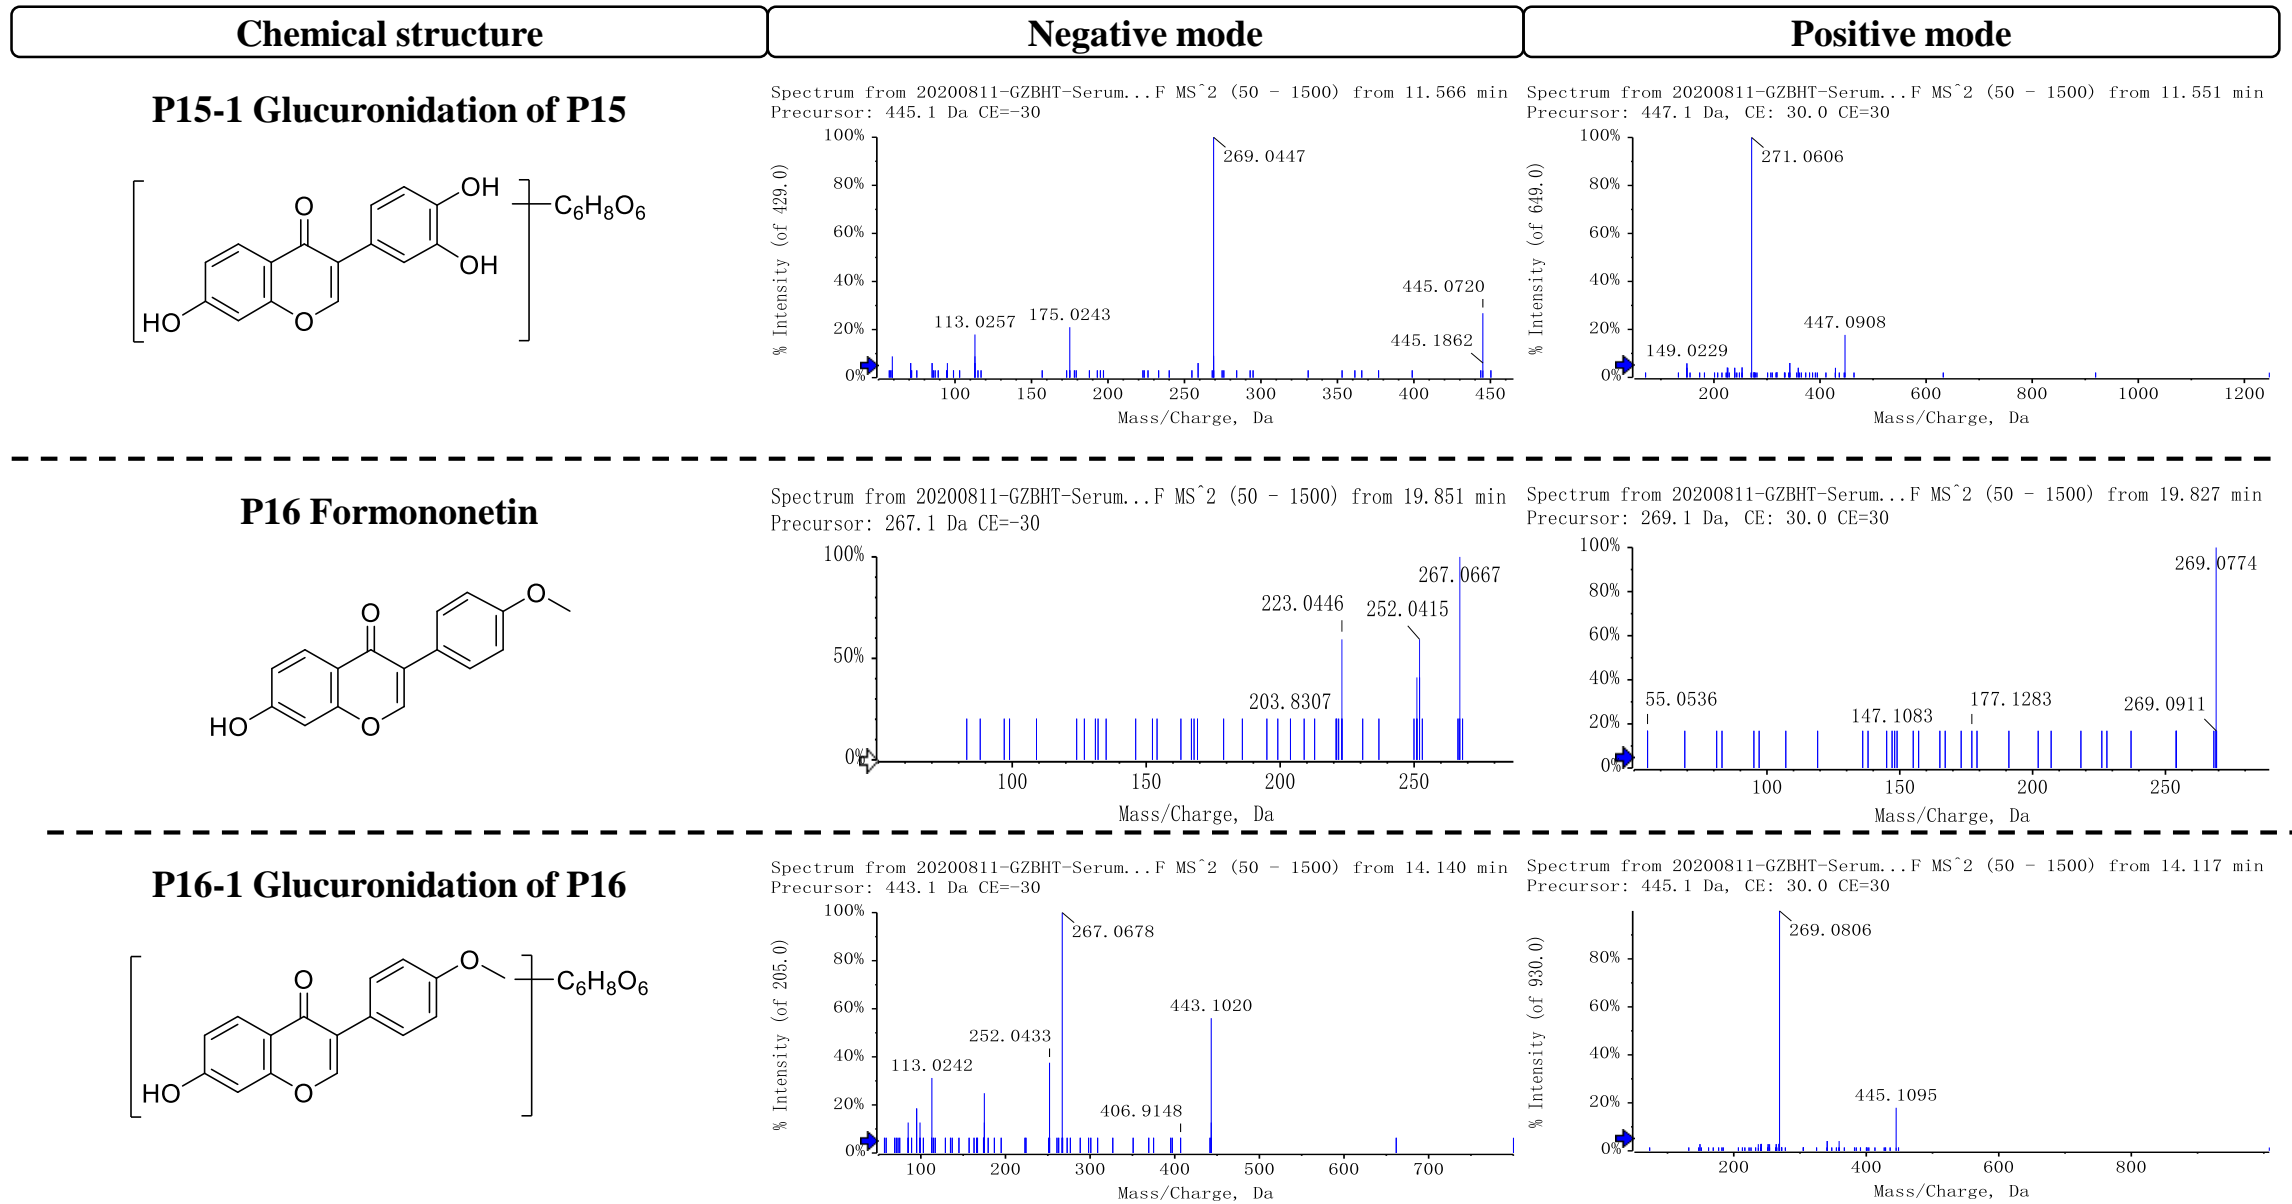

Figure S1. The chemical structure and corresponding MS/MS spectrum of absorbed components *in vivo*.

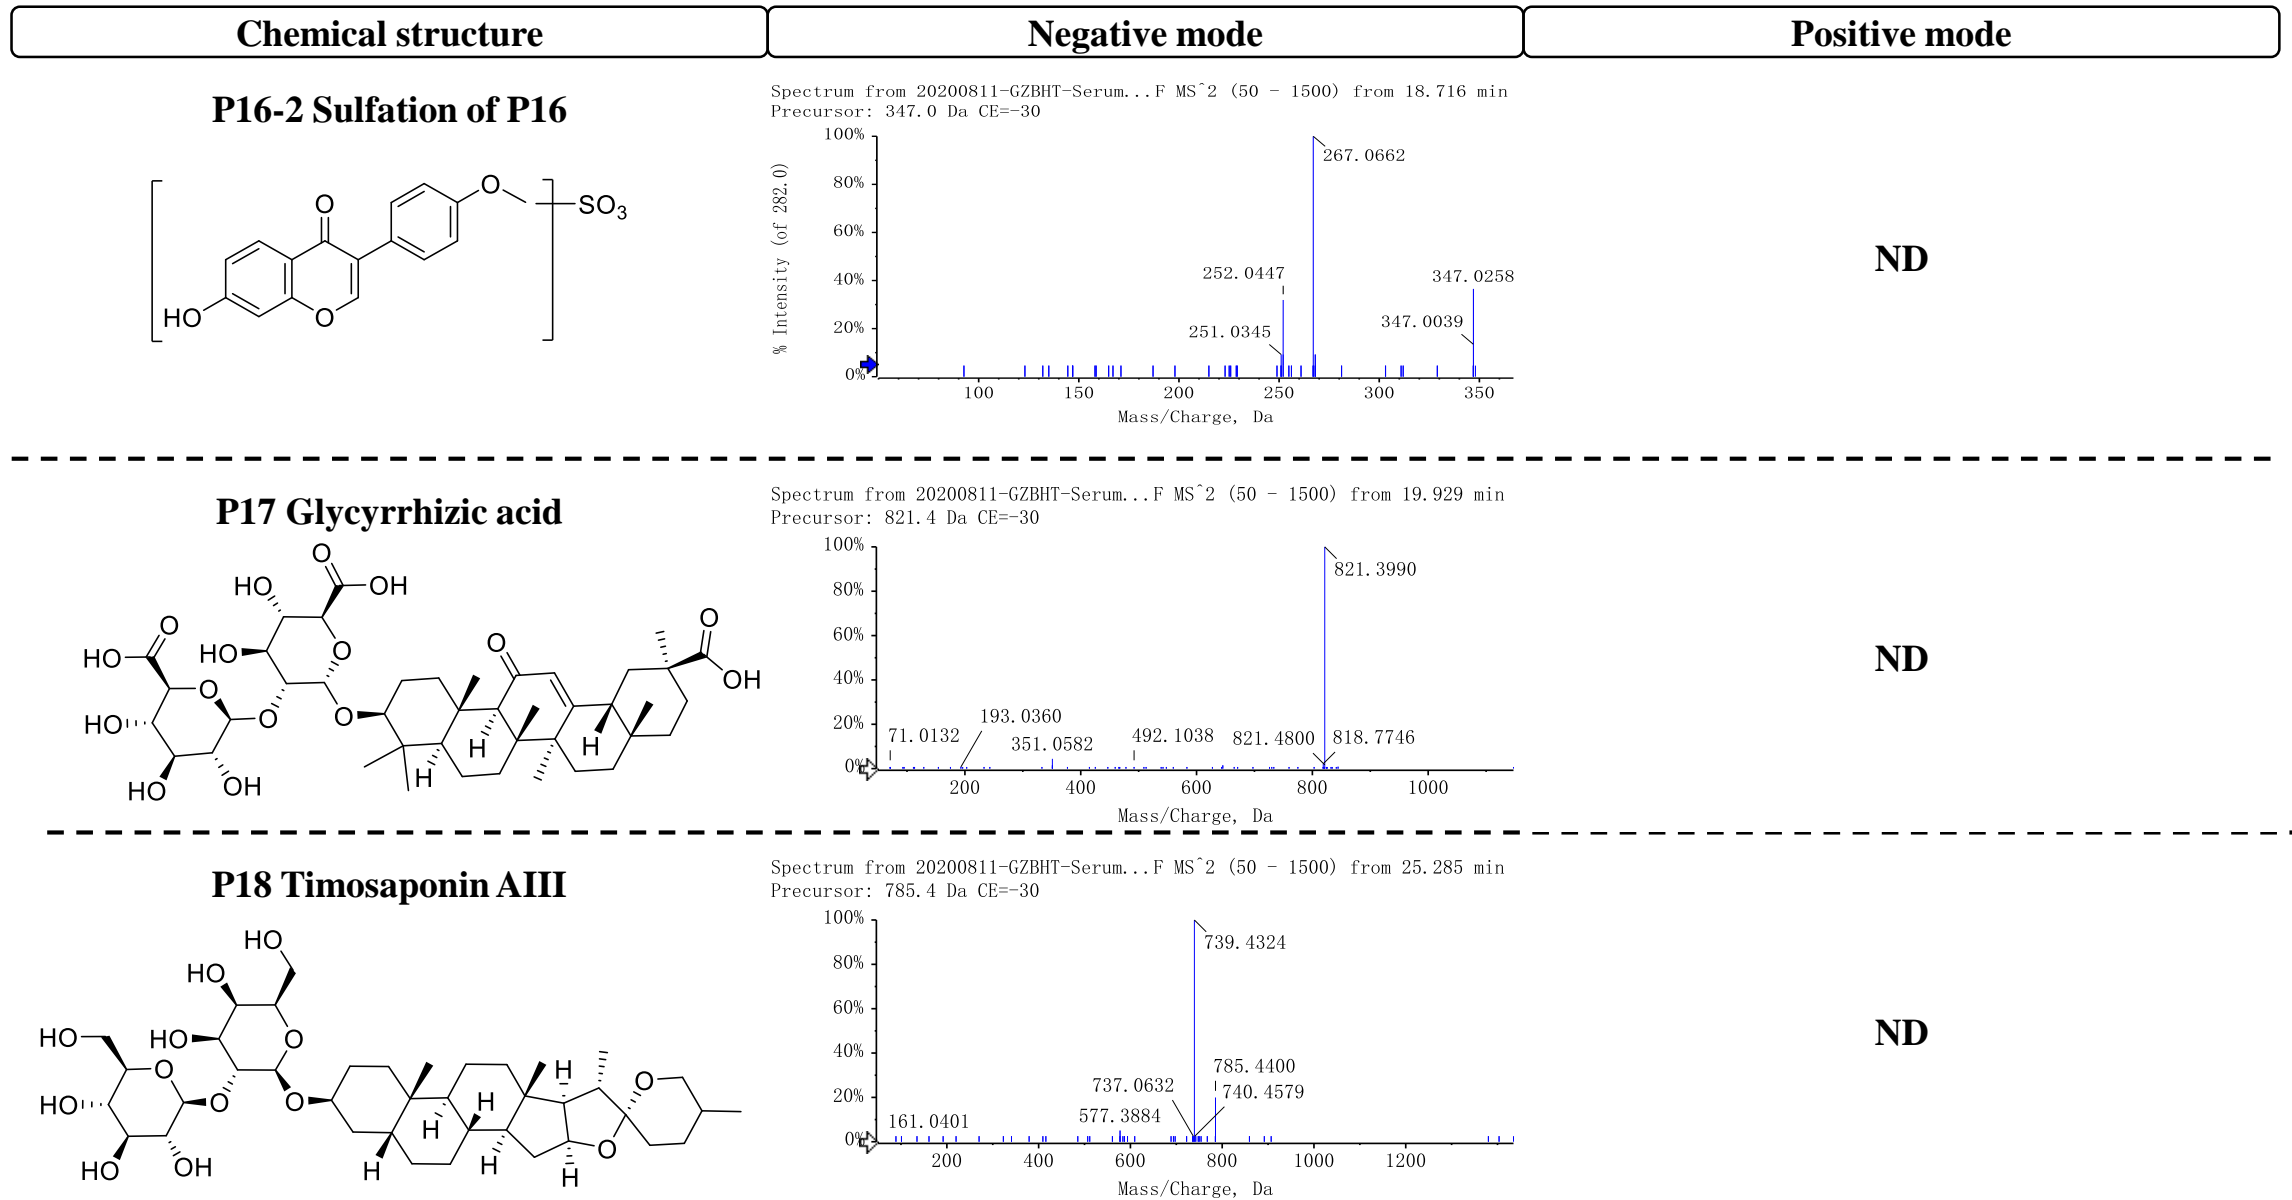

Supplement: 13020_2022_665_MOESM1_ESM.pdf [file 13020_2022_665_MOESM1_ESM.pdf]
