# Supplementary material for: Metabolic profiling and pharmacokinetic studies of Baihu-Guizhi decoction in rats by UFLC-Q-TOF–MS/MS and UHPLC-Q-TRAP-MS/MS
Source: PubMed Central journal article supplement (PMC9531372; doi:10.1186/s13020-022-00665-w), 2022-10-04
Supplement: 13020_2022_665_MOESM2_ESM.pdf [file 13020_2022_665_MOESM2_ESM.pdf]

## Mixed standards

BPC from 20200811-Mixed Standard-NEG.wiff (sample 1) - Sample001, Experiment 1, -TOF MS (50 - 1500)

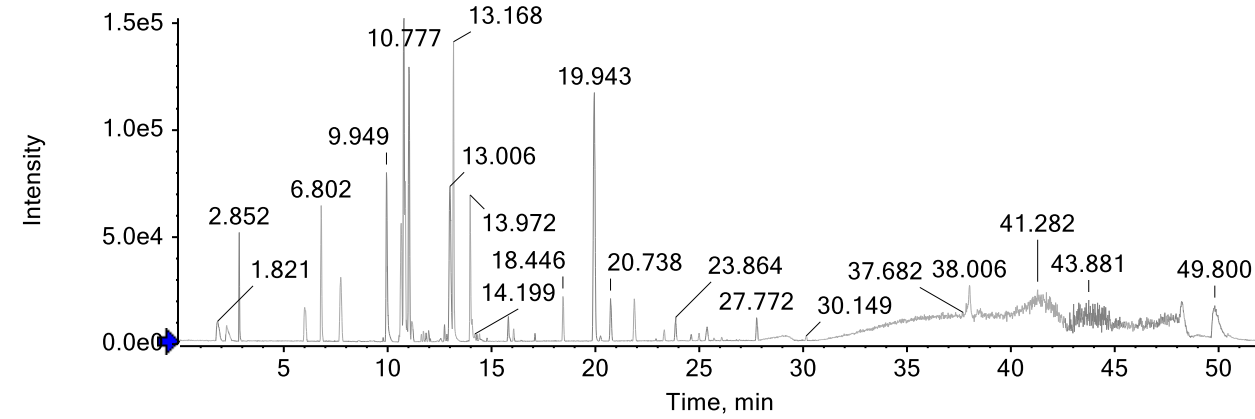

BPC from 20200811-Mixed Standard-POS.wiff (sample 1) - Sample001, Experiment 1, +TOF MS (50 - 1500)

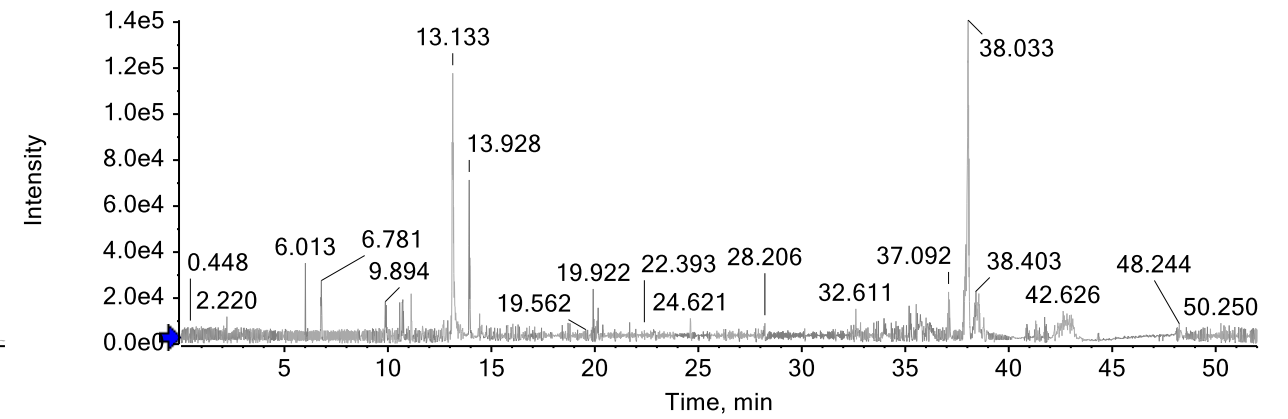

## Serum sample after BHGZD gavage(2h)

BPC from 20200811-GZBHT-Serum-2h-NEG.wiff (sample 1) - Sample005, Experiment 1, -TOF MS (50 - 1500)

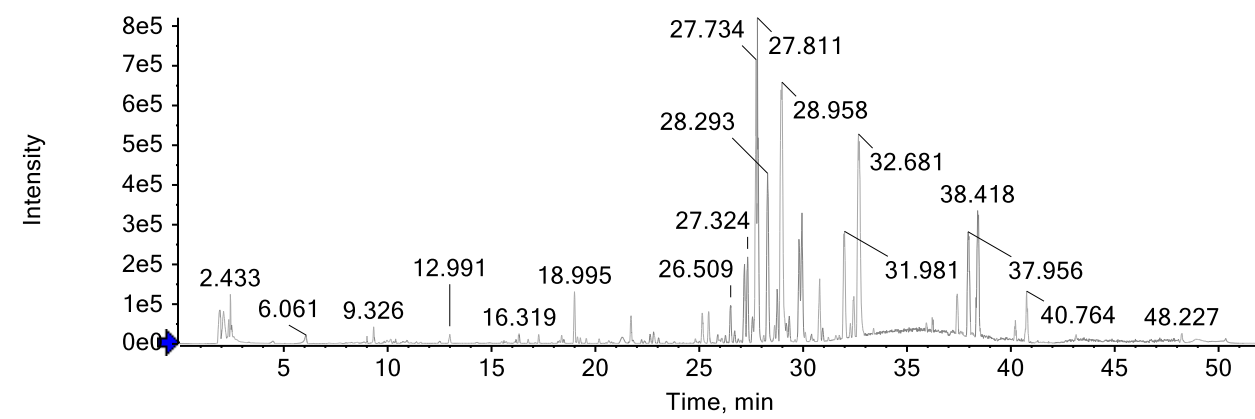

BPC from 20200811-GZBHT-Serum-2h-POS.wiff (sample 1) - Sample005, Experiment 1, +TOF MS (50 - 1500)

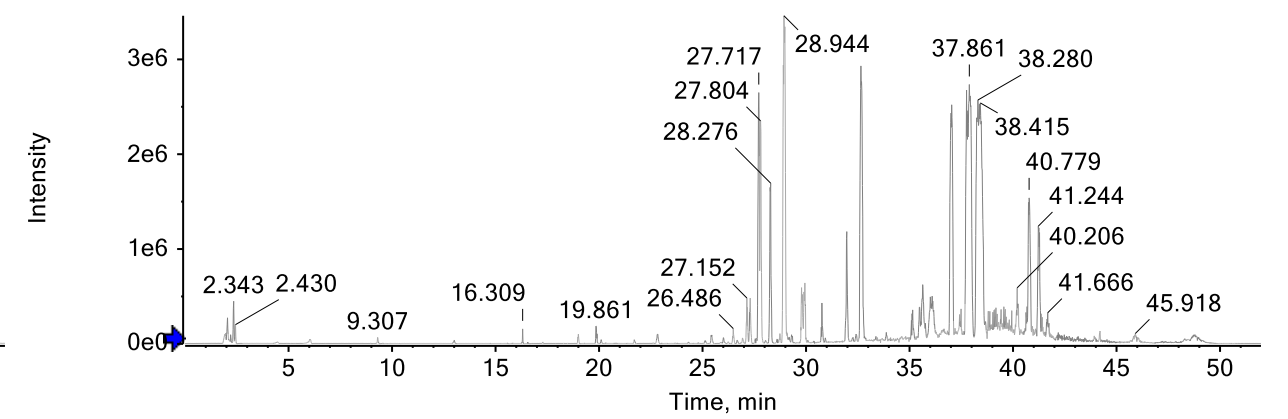

Figure S2. The chromatograms of mixed standards and serum sample after BHGZD gavage.
