# Supplementary material for: Metabolic profiling and pharmacokinetic studies of Baihu-Guizhi decoction in rats by UFLC-Q-TOF–MS/MS and UHPLC-Q-TRAP-MS/MS
Source: PubMed Central journal article supplement (PMC9531372; doi:10.1186/s13020-022-00665-w), 2022-10-04

# Graphical abstract

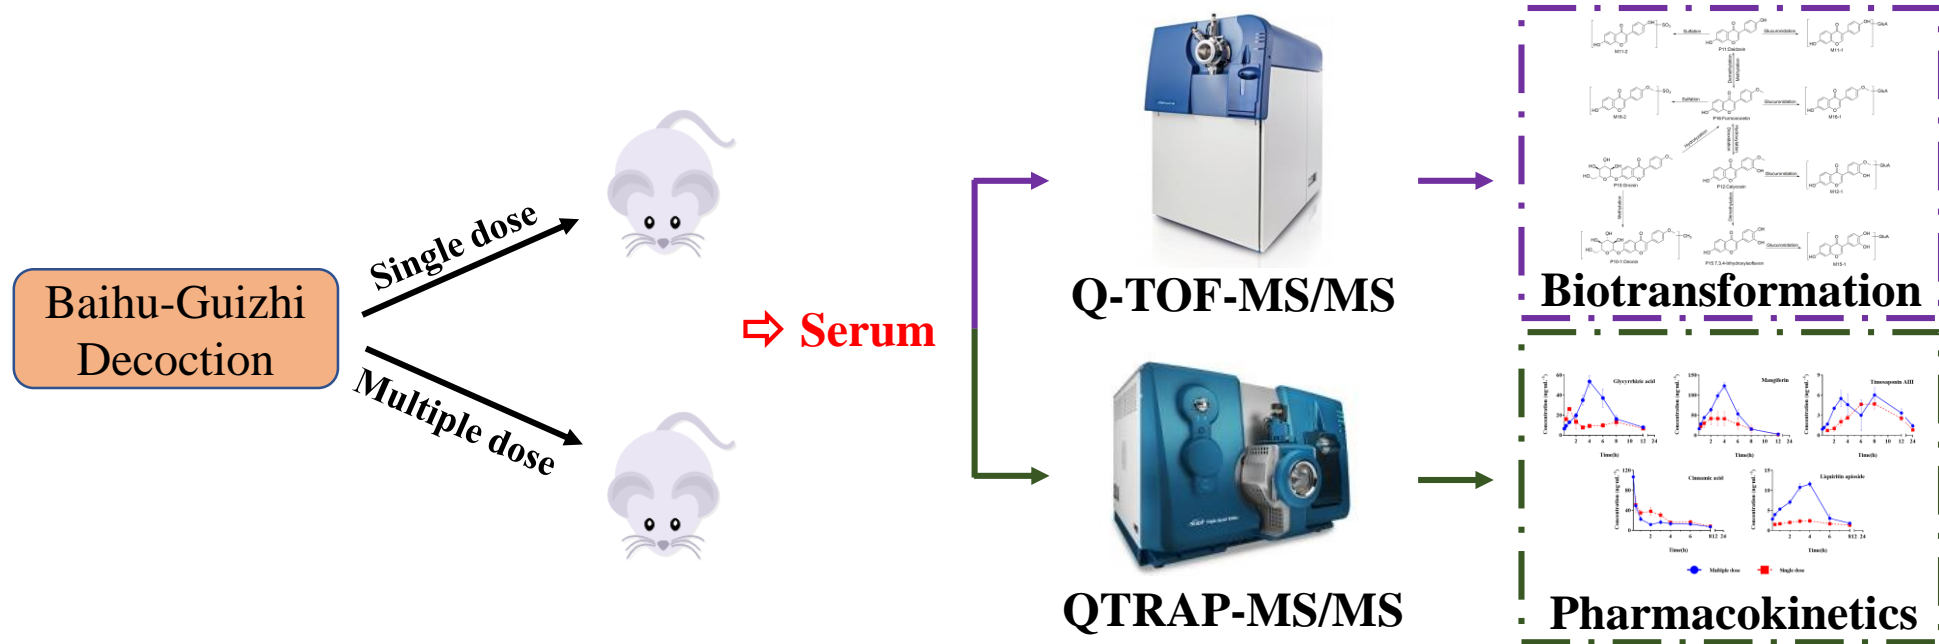

Supplement: 13020_2022_665_MOESM4_ESM.pdf [file 13020_2022_665_MOESM4_ESM.pdf]
