# Supplementary material for: Metabolic profiling and pharmacokinetic studies of Baihu-Guizhi decoction in rats by UFLC-Q-TOF–MS/MS and UHPLC-Q-TRAP-MS/MS
Source: PubMed Central journal article supplement (PMC9531372; doi:10.1186/s13020-022-00665-w), 2022-10-04
Supplement: 13020_2022_665_MOESM5_ESM.pdf [file 13020_2022_665_MOESM5_ESM.pdf]

Table S1. Identification of chemical profile of BHGZD *in vitro* by UFLC-Q-TOF-MS/MS.

| No. | Rt (mins) | Identification                              | Mass (Da) | Formula                                                       | Positive Ion (m/z)      |             | Characteristic fragment ions in positive ion mode (m/z)                                                                                                                                                                                                                                                                                                                                                                                                                                                                                                           | Negative Ion (m/z)      |             | Characteristic fragment ions in negative ion mode (m/z)                                                                                                                                                                                                                                                                                                                                                                                                                                             |
|-----|-----------|---------------------------------------------|-----------|---------------------------------------------------------------|-------------------------|-------------|-------------------------------------------------------------------------------------------------------------------------------------------------------------------------------------------------------------------------------------------------------------------------------------------------------------------------------------------------------------------------------------------------------------------------------------------------------------------------------------------------------------------------------------------------------------------|-------------------------|-------------|-----------------------------------------------------------------------------------------------------------------------------------------------------------------------------------------------------------------------------------------------------------------------------------------------------------------------------------------------------------------------------------------------------------------------------------------------------------------------------------------------------|
|     |           |                                             |           |                                                               | Mass [M+H] <sup>+</sup> | Error (ppm) |                                                                                                                                                                                                                                                                                                                                                                                                                                                                                                                                                                   | Mass [M-H] <sup>-</sup> | Error (ppm) |                                                                                                                                                                                                                                                                                                                                                                                                                                                                                                     |
| 1   | 1.35      | Arginine <sup>2</sup>                       | 174.1117  | C <sub>6</sub> H <sub>14</sub> N <sub>4</sub> O <sub>2</sub>  | 175.1191                | 0.9         | 158.0908 [M+H-NH <sub>3</sub> ] <sup>+</sup> , 130.0974 [M+H-COOH] <sup>+</sup> ,<br>116.0702 [M+H-CH <sub>3</sub> N <sub>3</sub> ] <sup>+</sup> , 70.0688 [M+H-HCOOH-CH <sub>4</sub> N <sub>3</sub> ] <sup>+</sup> ,<br>60.0603 [M+H-C <sub>3</sub> H <sub>9</sub> NO <sub>2</sub> ] <sup>+</sup>                                                                                                                                                                                                                                                                | —                       | —           |                                                                                                                                                                                                                                                                                                                                                                                                                                                                                                     |
| 2   | 1.55      | Proline <sup>2</sup>                        | 115.0633  | C <sub>5</sub> H <sub>9</sub> NO <sub>2</sub>                 | 116.0713                | 6.2         | 70.0688 [M+H-HCOOH] <sup>+</sup> , 68.0534                                                                                                                                                                                                                                                                                                                                                                                                                                                                                                                        | —                       | —           |                                                                                                                                                                                                                                                                                                                                                                                                                                                                                                     |
| 3   | 1.56      | Pipecolic acid <sup>2</sup>                 | 129.0790  | C <sub>6</sub> H <sub>11</sub> NO <sub>2</sub>                | 130.0867                | 3.4         | 84.0474 [M+H-HCOOH] <sup>+</sup> , 70.0691, 56.0551 [M+H-C <sub>3</sub> H <sub>6</sub> O <sub>2</sub> ] <sup>+</sup>                                                                                                                                                                                                                                                                                                                                                                                                                                              | —                       | —           |                                                                                                                                                                                                                                                                                                                                                                                                                                                                                                     |
| 4   | 2.01      | Nicotinic acid <sup>2</sup>                 | 123.0320  | C <sub>6</sub> H <sub>5</sub> NO <sub>2</sub>                 | 124.0405                | 9.6         | 106.0337 [M+H-H <sub>2</sub> O] <sup>+</sup> , 78.0375 [M+H-HCOOH] <sup>+</sup> ,<br>53.0451 [M+H-H <sub>2</sub> O-C <sub>3</sub> H <sub>3</sub> N] <sup>+</sup>                                                                                                                                                                                                                                                                                                                                                                                                  | —                       | —           |                                                                                                                                                                                                                                                                                                                                                                                                                                                                                                     |
| 5   | 2.04      | Citric acid <sup>2</sup>                    | 192.0270  | C <sub>6</sub> H <sub>8</sub> O <sub>7</sub>                  | —                       | —           |                                                                                                                                                                                                                                                                                                                                                                                                                                                                                                                                                                   | 191.0212                | 7.6         | 129.0193 [M-H-OH-COOH] <sup>-</sup> , 111.0092 [M-H-OH-COOH-H <sub>2</sub> O] <sup>-</sup> ,<br>87.0104 [M-H-COOH-CH <sub>2</sub> COOH] <sup>-</sup> , 85.0311, 67.0225, 57.0394 [C <sub>3</sub> H <sub>5</sub> O] <sup>-</sup>                                                                                                                                                                                                                                                                     |
| 6   | 2.16      | Isoleucine <sup>1, 2</sup>                  | 131.0946  | C <sub>6</sub> H <sub>13</sub> NO <sub>2</sub>                | 132.1025                | 4.8         | 86.0999 [M+H-HCOOH] <sup>+</sup> , 69.0738 [M+H-HCOOH-NH <sub>3</sub> ] <sup>+</sup> ,<br>56.0548 [M+H-HCOOH-CH <sub>4</sub> N] <sup>+</sup>                                                                                                                                                                                                                                                                                                                                                                                                                      | —                       | —           |                                                                                                                                                                                                                                                                                                                                                                                                                                                                                                     |
| 7   | 3.14      | Phenylalanine <sup>2</sup>                  | 165.0790  | C <sub>9</sub> H <sub>11</sub> NO <sub>2</sub>                | 166.0866                | 1.8         | 120.0822 [M+H-HCOOH] <sup>+</sup> , 103.0559 [M+H-HCOOH-NH <sub>3</sub> ] <sup>+</sup> ,<br>77.0416 [M+H-HCOOH-C <sub>2</sub> H <sub>2</sub> -NH <sub>3</sub> ] <sup>+</sup> , 51.0281                                                                                                                                                                                                                                                                                                                                                                            | —                       | —           |                                                                                                                                                                                                                                                                                                                                                                                                                                                                                                     |
| 8   | 3.66      | Pantothenic acid                            | 219.1107  | C <sub>9</sub> H <sub>17</sub> NO <sub>5</sub>                | 220.1180                | 0.3         | 202.1045 [M+H-H <sub>2</sub> O] <sup>+</sup> , 174.1048 [M+H-HCOOH] <sup>+</sup> ,<br>142.0860 [M+H-CH <sub>3</sub> OH-HCOOH] <sup>+</sup> ,<br>124.0765 [M+H-CH <sub>3</sub> OH-HCOOH-H <sub>2</sub> O] <sup>+</sup> ,<br>98.0283 [M+H-CH <sub>2</sub> COOH-CH <sub>2</sub> OH-CH <sub>3</sub> -OH] <sup>+</sup> ,<br>90.0583 [M+H-C <sub>5</sub> H <sub>10</sub> O <sub>2</sub> ] <sup>+</sup> , 70.0314 [M+H-CH <sub>2</sub> COOH-C <sub>4</sub> H <sub>9</sub> O-H <sub>2</sub> O] <sup>+</sup>                                                               | 218.1040                | 2.9         | 146.0784 [C <sub>6</sub> H <sub>12</sub> NO <sub>3</sub> ] <sup>-</sup> , 96.9602 [M-H-CH <sub>2</sub> COOH-CH <sub>2</sub> OH-CH <sub>3</sub> -OH] <sup>-</sup> ,<br>88.0405 [M-H-C <sub>5</sub> H <sub>10</sub> O <sub>2</sub> ] <sup>-</sup> , 71.0524 [M-H-C <sub>5</sub> H <sub>10</sub> O <sub>2</sub> -OH] <sup>-</sup>                                                                                                                                                                      |
| 9   | 4.46      | Protocatechuic acid <sup>1, 2</sup>         | 154.0266  | C <sub>7</sub> H <sub>6</sub> O <sub>4</sub>                  | 155.0343                | 2.7         | 137.0255 [M+H-H <sub>2</sub> O] <sup>+</sup> , 109.0309 [M+H-HCOOH] <sup>+</sup> , 93.0372 [C <sub>6</sub> H <sub>5</sub> O] <sup>+</sup> ,<br>65.0428 [C <sub>5</sub> H <sub>5</sub> ] <sup>+</sup>                                                                                                                                                                                                                                                                                                                                                              | —                       | —           |                                                                                                                                                                                                                                                                                                                                                                                                                                                                                                     |
| 10  | 5.05      | Tryptophan <sup>2</sup>                     | 204.0899  | C <sub>11</sub> H <sub>12</sub> N <sub>2</sub> O <sub>2</sub> | 205.0970                | -0.7        | 188.0819 [M+H-NH <sub>3</sub> ] <sup>+</sup> , 146.0610 [C <sub>9</sub> H <sub>10</sub> N <sub>2</sub> ] <sup>+</sup> ,<br>143.0736 [M+H-NH <sub>2</sub> -HCOOH] <sup>+</sup> , 118.0663 [M+H-C <sub>2</sub> H <sub>2</sub> NH <sub>2</sub> COOH] <sup>+</sup> ,<br>91.0564 [M+H-C <sub>4</sub> H <sub>4</sub> -HCOOH-NH <sub>2</sub> ] <sup>+</sup>                                                                                                                                                                                                              | 203.0833                | 3.5         | 142.0646 [M-H-NH <sub>2</sub> -COOH] <sup>-</sup> , 116.0491 [M-H-C <sub>2</sub> H <sub>2</sub> NH <sub>2</sub> COOH] <sup>-</sup> ,<br>74.0271 [C <sub>2</sub> H <sub>4</sub> NO <sub>2</sub> ] <sup>-</sup>                                                                                                                                                                                                                                                                                       |
| 11  | 6.35      | Benzaldehyde                                | 106.0412  | C <sub>7</sub> H <sub>6</sub> O                               | 107.0501                | 8.7         | 91.0556, 77.0414 [M+H-HCHO] <sup>+</sup> , 65.0412 [C <sub>5</sub> H <sub>5</sub> ] <sup>+</sup> , 51.0275                                                                                                                                                                                                                                                                                                                                                                                                                                                        | —                       | —           |                                                                                                                                                                                                                                                                                                                                                                                                                                                                                                     |
| 12  | 6.71      | p-Hydrobenzoic acid <sup>1, 2</sup>         | 138.0317  | C <sub>7</sub> H <sub>6</sub> O <sub>3</sub>                  | 139.0402                | 9.0         | 121.0308 [M+H-H <sub>2</sub> O] <sup>+</sup> , 93.0368 [M+H-HCOOH] <sup>+</sup> ,<br>77.0428 [M+H-OH-COOH] <sup>+</sup> , 65.0436 [M+H-OH-COOH-CH] <sup>+</sup>                                                                                                                                                                                                                                                                                                                                                                                                   | 137.0266                | 16.2        | 93.0358 [C <sub>6</sub> H <sub>5</sub> O] <sup>-</sup> , 65.0431 [M-H-COOH-C <sub>2</sub> H <sub>3</sub> ] <sup>-</sup>                                                                                                                                                                                                                                                                                                                                                                             |
| 13  | 7.53      | Neomangiferin <sup>1, 2</sup>               | 584.1377  | C <sub>25</sub> H <sub>28</sub> O <sub>16</sub>               | 585.1449                | -0.2        | 567.1313 [M+H-H <sub>2</sub> O] <sup>+</sup> , 435.0911 [M+H-C <sub>5</sub> H <sub>10</sub> O <sub>5</sub> ] <sup>+</sup> ,<br>387.0707 [M+H-H <sub>2</sub> O-Glc] <sup>+</sup> , 369.0602 [M+H-3H <sub>2</sub> O-Glc] <sup>+</sup> ,<br>327.0497 [M+H-Glc-C <sub>5</sub> H <sub>4</sub> O <sub>2</sub> ] <sup>+</sup> , 303.0497 [M+H-Glc-C <sub>4</sub> H <sub>8</sub> O <sub>4</sub> ] <sup>+</sup> ,<br>273.0497 [M+H-Glc-C <sub>5</sub> H <sub>10</sub> O <sub>5</sub> ] <sup>+</sup>                                                                        | 583.1304                | -0.1        | 565.1227 [M-H-H <sub>2</sub> O] <sup>-</sup> , 493.0999 [M-H-C <sub>3</sub> H <sub>6</sub> O <sub>3</sub> ] <sup>-</sup> ,<br>463.0887 [M-H-C <sub>4</sub> H <sub>8</sub> O <sub>4</sub> ] <sup>-</sup> , 421.0798 [M-H-Glc] <sup>-</sup> ,<br>403.0692 [M-H-Glc-H <sub>2</sub> O] <sup>-</sup> , 331.0458 [M-H-Glc-C <sub>3</sub> H <sub>6</sub> O <sub>3</sub> ] <sup>-</sup> ,<br>301.0353 [M+H-Glc-C <sub>4</sub> H <sub>8</sub> O <sub>4</sub> ] <sup>-</sup> , 259.0253 [M-2Glc] <sup>-</sup> |
| 14  | 8.51      | Caffeic acid <sup>1, 2</sup>                | 180.0423  | C <sub>9</sub> H <sub>8</sub> O <sub>4</sub>                  | —                       | —           |                                                                                                                                                                                                                                                                                                                                                                                                                                                                                                                                                                   | 179.0367                | 9.5         | 135.0436 [C <sub>8</sub> H <sub>7</sub> O <sub>2</sub> ] <sup>-</sup> , 99.9995 [M-H-OH-C <sub>2</sub> H <sub>2</sub> COOH] <sup>-</sup>                                                                                                                                                                                                                                                                                                                                                            |
| 15  | 9.64      | p-Hydroxyphenyl-propionic acid <sup>2</sup> | 166.0630  | C <sub>9</sub> H <sub>10</sub> O <sub>3</sub>                 | 167.0706                | 1.9         | 121.0582 [M+H-HCOOH] <sup>+</sup> , 107.0454 [M+H-CH <sub>3</sub> COOH] <sup>+</sup> ,<br>84.9650 [M+H-C <sub>6</sub> H <sub>5</sub> O] <sup>+</sup> , 77.0411 [M+H-OH-C <sub>2</sub> H <sub>4</sub> COOH] <sup>+</sup>                                                                                                                                                                                                                                                                                                                                           | —                       | —           |                                                                                                                                                                                                                                                                                                                                                                                                                                                                                                     |
| 16  | 9.95      | Mangiferin <sup>1, 2</sup>                  | 422.0849  | C <sub>19</sub> H <sub>18</sub> O <sub>11</sub>               | 423.0926                | 0.9         | 369.0615 [M+H-3H <sub>2</sub> O] <sup>+</sup> , 339.0507 [M+H-3H <sub>2</sub> O-CH <sub>2</sub> O] <sup>+</sup> ,<br>327.0506 [M+H-C <sub>5</sub> H <sub>2</sub> O] <sup>+</sup> , 315.0509 [M+H-C <sub>6</sub> H <sub>4</sub> O <sub>2</sub> ] <sup>+</sup><br>303.0497 [M+H-C <sub>4</sub> H <sub>8</sub> O <sub>4</sub> ] <sup>+</sup> , 273.0394 [M+H-C <sub>5</sub> H <sub>10</sub> O <sub>5</sub> ] <sup>+</sup> ,<br>257.0450 [M+H-C <sub>5</sub> H <sub>10</sub> O <sub>6</sub> ] <sup>+</sup>                                                            | 421.0780                | 0.8         | 331.0457 [M-H-C <sub>3</sub> H <sub>6</sub> O <sub>3</sub> ] <sup>-</sup> , 301.0351 [M-H-C <sub>4</sub> H <sub>8</sub> O <sub>4</sub> ] <sup>-</sup> ,<br>271.0249 [M-H-C <sub>5</sub> H <sub>10</sub> O <sub>5</sub> ] <sup>-</sup> , 259.0253 [M-Glc] <sup>-</sup> ,<br>243.0294 [M-H-Glc-OH] <sup>-</sup>                                                                                                                                                                                       |
| 17  | 11.86     | p-Coumaric acid <sup>2</sup>                | 164.0473  | C <sub>9</sub> H <sub>8</sub> O <sub>3</sub>                  | 165.0550                | 2.4         | 147.0422 [M+H-H <sub>2</sub> O] <sup>+</sup> , 119.0494 [M+H-HCOOH] <sup>+</sup> ,<br>93.0337 [M+H-C <sub>2</sub> H <sub>3</sub> COOH] <sup>+</sup> , 91.0551 [M+H-HCOOH-CO] <sup>+</sup> ,<br>65.0423 [C <sub>5</sub> H <sub>5</sub> ] <sup>+</sup>                                                                                                                                                                                                                                                                                                              | 163.0422                | 13.2        | 119.0500 [C <sub>8</sub> H <sub>7</sub> O] <sup>-</sup> , 93.0360 [C <sub>6</sub> H <sub>5</sub> O] <sup>-</sup> , 65.0456 [C <sub>5</sub> H <sub>5</sub> ] <sup>-</sup>                                                                                                                                                                                                                                                                                                                            |
| 18  | 12.32     | Isoschaftoside <sup>2</sup>                 | 564.1479  | C <sub>26</sub> H <sub>28</sub> O <sub>14</sub>               | 565.1540                | -2.1        | 511.1218 [M+H-3H <sub>2</sub> O] <sup>+</sup> , 481.1125 [M+H-2H <sub>2</sub> O-CHOH] <sup>+</sup> ,<br>427.1018 [M+H-C <sub>4</sub> H <sub>8</sub> O <sub>4</sub> -H <sub>2</sub> O] <sup>+</sup> , 409.0911 [M+H-C <sub>4</sub> H <sub>8</sub> O <sub>4</sub> -2H <sub>2</sub> O] <sup>+</sup><br>391.0811 [M+H-C <sub>7</sub> H <sub>10</sub> O <sub>5</sub> ] <sup>+</sup> , 379.0814 [M+H-C <sub>4</sub> H <sub>8</sub> O <sub>4</sub> -2H <sub>2</sub> O-CHOH] <sup>+</sup> ,<br>325.0704 [M+H-2C <sub>4</sub> H <sub>8</sub> O <sub>4</sub> ] <sup>+</sup> | 563.1408                | 0.4         | 473.1101 [M-H-C <sub>3</sub> H <sub>6</sub> O <sub>3</sub> ] <sup>-</sup> , 443.1006 [M-H-C <sub>4</sub> H <sub>8</sub> O <sub>4</sub> ] <sup>-</sup> ,<br>383.0773 [M-H-C <sub>4</sub> H <sub>8</sub> O <sub>4</sub> -C <sub>2</sub> H <sub>2</sub> O <sub>2</sub> ] <sup>-</sup> , 353.0677 [M-H-C <sub>4</sub> H <sub>8</sub> O <sub>4</sub> -C <sub>3</sub> H <sub>6</sub> O <sub>3</sub> ] <sup>-</sup>                                                                                        |

Table S1. Identification of chemical profile of BHGZD *in vitro* by UFLC-Q-TOF-MS/MS.

| No. | Rt (mins) | Identification                     | Mass (Da) | Formula                                         | Positive Ion ( <i>m/z</i> ) |             | Characteristic fragment ions in positive ion mode ( <i>m/z</i> )                                                                                                                                                                                                                                                                                                                                                                | Negative Ion ( <i>m/z</i> ) |             | Characteristic fragment ions in negative ion mode ( <i>m/z</i> )                                                                                                                                                                                                                                                                             |
|-----|-----------|------------------------------------|-----------|-------------------------------------------------|-----------------------------|-------------|---------------------------------------------------------------------------------------------------------------------------------------------------------------------------------------------------------------------------------------------------------------------------------------------------------------------------------------------------------------------------------------------------------------------------------|-----------------------------|-------------|----------------------------------------------------------------------------------------------------------------------------------------------------------------------------------------------------------------------------------------------------------------------------------------------------------------------------------------------|
|     |           |                                    |           |                                                 | Mass [M+H] <sup>+</sup>     | Error (ppm) |                                                                                                                                                                                                                                                                                                                                                                                                                                 | Mass [M-H] <sup>-</sup>     | Error (ppm) |                                                                                                                                                                                                                                                                                                                                              |
| 19  | 12.71     | Orientin <sup>2</sup>              | 448.1006  | C <sub>21</sub> H <sub>20</sub> O <sub>11</sub> | 449.1076                    | -0.4        | 431.0984 [M+H-H <sub>2</sub> O] <sup>+</sup> , 413.0842 [M+H-2H <sub>2</sub> O] <sup>+</sup> , 395.0774 [M+H-3H <sub>2</sub> O] <sup>+</sup> , 329.0647 [M+H-C <sub>4</sub> H <sub>8</sub> O <sub>4</sub> ] <sup>+</sup> , 299.0575 [M+H-C <sub>5</sub> H <sub>10</sub> O <sub>5</sub> ] <sup>+</sup>                                                                                                                           | 447.0937                    | 0.9         | 357.0610 [M-H-C <sub>3</sub> H <sub>6</sub> O <sub>3</sub> ] <sup>-</sup> , 327.0531 [M-H-C <sub>4</sub> H <sub>8</sub> O <sub>4</sub> ] <sup>-</sup> , 299.0534, 297.0412 [M-H-C <sub>5</sub> H <sub>10</sub> O <sub>5</sub> ] <sup>-</sup> , 284.0299 [M-H-Glu] <sup>-</sup>                                                               |
| 20  | 13.15     | Schaftoside <sup>2</sup>           | 564.1479  | C <sub>26</sub> H <sub>28</sub> O <sub>14</sub> | 565.1546                    | -1.1        | 547.1380 [M+H-H <sub>2</sub> O] <sup>+</sup> , 529.1333 [M+H-2H <sub>2</sub> O] <sup>+</sup> , 511.1218 [M+H-3H <sub>2</sub> O] <sup>+</sup> , 445.1068 [M+H-C <sub>4</sub> H <sub>8</sub> O <sub>4</sub> ] <sup>+</sup> , 397.0964 [M+H-C <sub>4</sub> H <sub>8</sub> O <sub>4</sub> -H <sub>2</sub> O-CHOH] <sup>+</sup> , 379.0814 [M+H-C <sub>4</sub> H <sub>8</sub> O <sub>4</sub> -2H <sub>2</sub> O-CHOH] <sup>+</sup> , | —                           | —           |                                                                                                                                                                                                                                                                                                                                              |
| 21  | 13.62     | Ferulic acid <sup>1,2</sup>        | 194.0579  | C <sub>10</sub> H <sub>10</sub> O <sub>4</sub>  | —                           | —           |                                                                                                                                                                                                                                                                                                                                                                                                                                 | 193.0530                    | 12.4        | 178.0240 [M-H-CH <sub>3</sub> ] <sup>-</sup> , 148.9005 [M-H-COOH] <sup>-</sup> , 133.0312 [M-H-COOH-CH <sub>3</sub> ] <sup>-</sup>                                                                                                                                                                                                          |
| 22  | 13.83     | 7-O-Methyl mangiferin <sup>2</sup> | 436.1006  | C <sub>20</sub> H <sub>20</sub> O <sub>11</sub> | 437.1075                    | -0.8        | 341.0661, 317.0646 [M+H-C <sub>4</sub> H <sub>8</sub> O <sub>4</sub> ] <sup>+</sup> , 287.0560 [M+H-C <sub>5</sub> H <sub>10</sub> O <sub>5</sub> ] <sup>+</sup>                                                                                                                                                                                                                                                                | 435.0936                    | 0.7         | 345.0624 [M-H-C <sub>3</sub> H <sub>6</sub> O <sub>3</sub> ] <sup>-</sup> , 330.0356 [M-H-C <sub>3</sub> H <sub>6</sub> O <sub>3</sub> -CH <sub>3</sub> ] <sup>-</sup> , 315.0499 [M-H-C <sub>4</sub> H <sub>8</sub> O <sub>4</sub> ] <sup>-</sup> , 272.0306 [M-H-Glc] <sup>-</sup>                                                         |
| 23  | 13.86     | Liquiritigenin-7,4-diglucoside     | 580.1792  | C <sub>27</sub> H <sub>32</sub> O <sub>14</sub> | 581.1865                    | 0.2         | 419.1346 [M+H-Glc] <sup>+</sup> , 257.0821 [M+H-2Glc] <sup>+</sup> , 137.0246 [M+H-2Glc-C <sub>6</sub> H <sub>6</sub> O] <sup>+</sup>                                                                                                                                                                                                                                                                                           | 579.1719                    | 1.0         | 417.1198 [M-H-Glc] <sup>-</sup> , 255.0644 [M-H-2Glc] <sup>-</sup> , 135.0067 [M-H-2Glc-C <sub>6</sub> H <sub>6</sub> O] <sup>-</sup>                                                                                                                                                                                                        |
| 24  | 14.22     | Vitexin <sup>2</sup>               | 432.1057  | C <sub>21</sub> H <sub>20</sub> O <sub>10</sub> | 433.1133                    | 0.9         | 415.1030 [M+H-H <sub>2</sub> O] <sup>+</sup> , 397.0913 [M+H-2H <sub>2</sub> O] <sup>+</sup> , 367.0820 [M+H-2H <sub>2</sub> O-CHOH] <sup>+</sup> , 337.0719 [M+H-2H <sub>2</sub> O-C <sub>2</sub> H <sub>4</sub> O <sub>2</sub> ] <sup>+</sup> , 313.0715 [M+H-C <sub>4</sub> H <sub>8</sub> O <sub>4</sub> ] <sup>+</sup> , 283.0611 [M+H-C <sub>5</sub> H <sub>10</sub> O <sub>5</sub> ] <sup>+</sup>                        | 431.0988                    | 0.9         | 341.0675 [M-H-C <sub>3</sub> H <sub>6</sub> O <sub>3</sub> ] <sup>-</sup> , 311.0571 [M-H-C <sub>4</sub> H <sub>8</sub> O <sub>4</sub> ] <sup>-</sup> , 283.0623                                                                                                                                                                             |
| 25  | 14.24     | Licochalcone B                     | 286.0841  | C <sub>16</sub> H <sub>14</sub> O <sub>5</sub>  | —                           | —           |                                                                                                                                                                                                                                                                                                                                                                                                                                 | 285.0771                    | 1.0         | 242.0889 [M-H-C <sub>2</sub> H <sub>3</sub> O] <sup>-</sup> , 109.0297, 93.0371 [C <sub>6</sub> H <sub>5</sub> O] <sup>-</sup>                                                                                                                                                                                                               |
| 26  | 14.28     | Liquiritin <sup>1,2</sup>          | 418.1264  | C <sub>21</sub> H <sub>22</sub> O <sub>9</sub>  | —                           | —           |                                                                                                                                                                                                                                                                                                                                                                                                                                 | 417.1195                    | 1.1         | 255.0663 [M-H-Glc] <sup>-</sup> , 135.0091 [M-H-Glc-C <sub>6</sub> H <sub>6</sub> O] <sup>-</sup> , 119.0510 [M-H-Glc-C <sub>7</sub> H <sub>4</sub> O <sub>3</sub> ] <sup>-</sup> , 91.0209 [M-H-Glc-C <sub>9</sub> H <sub>8</sub> O <sub>3</sub> ] <sup>-</sup>                                                                             |
| 27  | 14.49     | Liquiritin apioside <sup>1,2</sup> | 550.1686  | C <sub>26</sub> H <sub>30</sub> O <sub>13</sub> | 551.1754                    | -1.0        | 257.0820 [M+H-Api-Glc] <sup>+</sup> , 137.0240 [M+H-Api-Glc-C <sub>6</sub> H <sub>6</sub> O] <sup>+</sup>                                                                                                                                                                                                                                                                                                                       | 549.1620                    | 1.1         | 417.1209 [M-H-Api] <sup>-</sup> , 255.0659 [M-H-Api-Glc] <sup>-</sup> , 135.0092 [M-Api-Glc-C <sub>6</sub> H <sub>6</sub> O] <sup>-</sup> , 119.0510 [M-H-Api-Glc-C <sub>7</sub> H <sub>4</sub> O <sub>3</sub> ] <sup>-</sup> , 91.0209 [M-H-Api-Glc-C <sub>9</sub> H <sub>8</sub> O <sub>3</sub> ] <sup>-</sup>                             |
| 28  | 14.78     | Isovitexin <sup>2</sup>            | 432.1057  | C <sub>21</sub> H <sub>20</sub> O <sub>10</sub> | 433.1134                    | 1.1         | 397.0928 [M+H-2H <sub>2</sub> O] <sup>+</sup> , 379.0822 [M+H-3H <sub>2</sub> O] <sup>+</sup> , 367.0830 [M+H-2H <sub>2</sub> O-CHOH] <sup>+</sup> , 337.0718 [M+H-2H <sub>2</sub> O-C <sub>2</sub> H <sub>4</sub> O <sub>2</sub> ] <sup>+</sup> , 313.0717 [M+H-C <sub>4</sub> H <sub>8</sub> O <sub>4</sub> ] <sup>+</sup> , 283.0622 [M+H-C <sub>5</sub> H <sub>10</sub> O <sub>5</sub> ] <sup>+</sup>                       | 431.0987                    | 0.8         | 341.0676 [M-H-C <sub>3</sub> H <sub>6</sub> O <sub>3</sub> ] <sup>-</sup> , 311.0568 [M-H-C <sub>4</sub> H <sub>8</sub> O <sub>4</sub> ] <sup>-</sup> , 283.0612                                                                                                                                                                             |
| 29  | 16.32     | Isoquercitrin                      | 464.0955  | C <sub>21</sub> H <sub>20</sub> O <sub>12</sub> | 465.1021                    | -1.4        | 447.0894 [M+H-H <sub>2</sub> O] <sup>+</sup> , 369.0630 [M+H-C <sub>5</sub> H <sub>10</sub> O <sub>5</sub> ] <sup>+</sup> , 303.0513 [M+H-Glc] <sup>+</sup> , 273.0375 [M+H-Glc-CO] <sup>+</sup>                                                                                                                                                                                                                                | 463.0886                    | 0.8         | 331.0469 [M-H-C <sub>5</sub> H <sub>10</sub> O <sub>4</sub> ] <sup>-</sup> , 301.0351 [M-H-Glc] <sup>-</sup> , 259.0244 [M-H-Glc-C <sub>2</sub> H <sub>2</sub> O] <sup>-</sup>                                                                                                                                                               |
| 30  | 16.84     | Coumarin <sup>2</sup>              | 146.0368  | C <sub>9</sub> H <sub>6</sub> O <sub>2</sub>    | 147.0447                    | 4.3         | 119.0466 [M+H-CO] <sup>+</sup> , 103.0556 [M+H-CO <sub>2</sub> ] <sup>+</sup> , 91.0564 [M+H-C <sub>2</sub> O <sub>2</sub> ] <sup>+</sup> , 77.0416 [M+H-C <sub>3</sub> H <sub>2</sub> O <sub>2</sub> ] <sup>+</sup> , 65.0423 [M+H-C <sub>4</sub> H <sub>2</sub> O <sub>2</sub> ] <sup>+</sup>                                                                                                                                 | —                           | —           |                                                                                                                                                                                                                                                                                                                                              |
| 31  | 17.27     | Hydroxygenkwanin <sup>2</sup>      | 300.0634  | C <sub>16</sub> H <sub>12</sub> O <sub>6</sub>  | 301.0709                    | 0.9         | 283.0616 [M+H-H <sub>2</sub> O] <sup>+</sup> , 167.0336 [M+H-C <sub>8</sub> H <sub>8</sub> O <sub>2</sub> ] <sup>+</sup> , 134.0376 [C <sub>8</sub> H <sub>8</sub> O <sub>2</sub> ] <sup>+</sup>                                                                                                                                                                                                                                | 299.0571                    | 3.3         | 239.0346 [M-H-OH-C <sub>2</sub> H <sub>3</sub> O] <sup>-</sup> , 199.0394                                                                                                                                                                                                                                                                    |
| 32  | 17.92     | Genistin <sup>2</sup>              | 432.1057  | C <sub>21</sub> H <sub>20</sub> O <sub>10</sub> | 433.1133                    | 0.8         | 271.0605 [M+H-Glc] <sup>+</sup> , 153.0203 [M+H-Glc-C <sub>6</sub> H <sub>6</sub> O] <sup>+</sup>                                                                                                                                                                                                                                                                                                                               | 431.0986                    | 0.5         | 269.0411 [M-H-Glc] <sup>-</sup> , 151.0047 [M-Glc-C <sub>6</sub> H <sub>6</sub> O] <sup>-</sup>                                                                                                                                                                                                                                              |
| 33  | 18.94     | Timosaponin N                      | 936.4930  | C <sub>45</sub> H <sub>76</sub> O <sub>20</sub> | —                           | —           |                                                                                                                                                                                                                                                                                                                                                                                                                                 | 935.4863                    | 0.6         | 917.4835 [M-OH] <sup>-</sup> , 755.4289 [M-H-OH-Glc] <sup>-</sup>                                                                                                                                                                                                                                                                            |
| 34  | 18.94     | Timosaponin E                      | 936.4930  | C <sub>45</sub> H <sub>76</sub> O <sub>20</sub> | —                           | —           |                                                                                                                                                                                                                                                                                                                                                                                                                                 | 935.4865                    | 0.8         | 773.4419 [M-H-Glc] <sup>-</sup> , 611.3839 [M-H-Glc-Gal] <sup>-</sup>                                                                                                                                                                                                                                                                        |
| 35  | 19.46     | Glycyroside                        | 562.1686  | C <sub>27</sub> H <sub>30</sub> O <sub>13</sub> | 563.1751                    | -1.4        | 269.0818 [M+H-Api-Glc] <sup>+</sup>                                                                                                                                                                                                                                                                                                                                                                                             | —                           | —           |                                                                                                                                                                                                                                                                                                                                              |
| 36  | 19.85     | Isoliquiritin apioside             | 550.1686  | C <sub>26</sub> H <sub>30</sub> O <sub>13</sub> | 551.1759                    | -0.1        | 419.1346 [M+H-Api] <sup>+</sup> , 257.0815 [M+H-Api-Glc] <sup>+</sup> , 137.0245 [M+H-Api-Glc-C <sub>6</sub> H <sub>6</sub> O] <sup>+</sup>                                                                                                                                                                                                                                                                                     | 549.1614                    | 0.0         | 297.0764, 255.0662 [M-H-Api-Glc] <sup>-</sup> , 135.0245 [M-H-Api-Glc-C <sub>6</sub> H <sub>6</sub> O] <sup>-</sup>                                                                                                                                                                                                                          |
| 37  | 19.95     | Ononin <sup>2</sup>                | 430.1264  | C <sub>22</sub> H <sub>22</sub> O <sub>9</sub>  | 431.1335                    | -0.4        | 269.0812 [M+H-Glc] <sup>+</sup> , 254.0580 [M+H-Glc-CH <sub>3</sub> ] <sup>+</sup>                                                                                                                                                                                                                                                                                                                                              | —                           | —           |                                                                                                                                                                                                                                                                                                                                              |
| 38  | 20.37     | Isoliquiritin <sup>2</sup>         | 418.1264  | C <sub>21</sub> H <sub>22</sub> O <sub>9</sub>  | 419.1337                    | 0.9         | 257.0817 [M+H-Glc] <sup>+</sup> , 147.0446 [M+H-Glc-C <sub>6</sub> H <sub>6</sub> O <sub>2</sub> ] <sup>+</sup> , 137.0242 [M+H-Glu-C <sub>6</sub> H <sub>8</sub> O] <sup>+</sup> , 119.0495 [M+H-Glu-C <sub>7</sub> H <sub>6</sub> O <sub>3</sub> ] <sup>+</sup>                                                                                                                                                               | 417.1191                    | 0.3         | 255.0662 [M-H-Glc] <sup>-</sup> , 148.0163, 135.0085 [M-H-Glc-C <sub>6</sub> H <sub>6</sub> O] <sup>-</sup> , 119.0503 [M-H-C <sub>7</sub> H <sub>4</sub> O <sub>3</sub> ] <sup>-</sup>                                                                                                                                                      |
| 39  | 20.86     | Timosaponin E1                     | 936.4930  | C <sub>45</sub> H <sub>76</sub> O <sub>20</sub> | —                           | —           |                                                                                                                                                                                                                                                                                                                                                                                                                                 | 935.4859                    | 0.1         | 773.4401 [M-H-Glc] <sup>-</sup> , 611.3850 [M-H-Glc-Gal] <sup>-</sup>                                                                                                                                                                                                                                                                        |
| 40  | 20.88     | Officialisninsin I                 | 920.4981  | C <sub>45</sub> H <sub>76</sub> O <sub>19</sub> | 921.4954                    | -10.8       | 759.4396 [M+H-Glc] <sup>+</sup> , 597.3895 [M+H-Glc-Gal] <sup>+</sup> , 433.3319 [M+H-Glc-Gal-Glc] <sup>+</sup> , 415.3207 [M+H-Glc-Gal-Glc-H <sub>2</sub> O] <sup>+</sup> , 271.2051                                                                                                                                                                                                                                           | —                           | —           |                                                                                                                                                                                                                                                                                                                                              |
| 41  | 20.96     | Neoisoliquiritin <sup>1,2</sup>    | 418.1264  | C <sub>21</sub> H <sub>22</sub> O <sub>9</sub>  | 419.1337                    | 0.2         | 257.0824 [M+H-Glc] <sup>+</sup> , 137.0243 [C <sub>7</sub> H <sub>5</sub> O <sub>3</sub> ] <sup>+</sup> , 119.0507 [M+H-Glc-C <sub>7</sub> H <sub>5</sub> O <sub>3</sub> ] <sup>+</sup>                                                                                                                                                                                                                                         | 417.1191                    | 0.2         | 255.0663 [M-H-Glc] <sup>-</sup> , 148.0614 [M-H-Glc-C <sub>7</sub> H <sub>5</sub> O <sub>3</sub> ] <sup>-</sup> , 135.0087 [M-H-Glc-C <sub>6</sub> H <sub>6</sub> O] <sup>-</sup> , 119.0510 [M-H-C <sub>7</sub> H <sub>4</sub> O <sub>3</sub> ] <sup>-</sup> , 91.0207 [M-H-Glc-C <sub>9</sub> H <sub>7</sub> O <sub>3</sub> ] <sup>-</sup> |

Table S1. Identification of chemical profile of BHGZD *in vitro* by UFLC-Q-TOF-MS/MS.

| No. | Rt (mins) | Identification                           | Mass (Da) | Formula                                         | Positive Ion ( <i>m/z</i> ) |             | Characteristic fragment ions in positive ion mode ( <i>m/z</i> )                                                                                                                                                                                                                                                                                                                                                                                                                     | Negative Ion ( <i>m/z</i> ) |             | Characteristic fragment ions in negative ion mode ( <i>m/z</i> )                                                                                                                                                                                                                                                                                                                   |
|-----|-----------|------------------------------------------|-----------|-------------------------------------------------|-----------------------------|-------------|--------------------------------------------------------------------------------------------------------------------------------------------------------------------------------------------------------------------------------------------------------------------------------------------------------------------------------------------------------------------------------------------------------------------------------------------------------------------------------------|-----------------------------|-------------|------------------------------------------------------------------------------------------------------------------------------------------------------------------------------------------------------------------------------------------------------------------------------------------------------------------------------------------------------------------------------------|
|     |           |                                          |           |                                                 | Mass [M+H] <sup>+</sup>     | Error (ppm) |                                                                                                                                                                                                                                                                                                                                                                                                                                                                                      | Mass [M-H] <sup>-</sup>     | Error (ppm) |                                                                                                                                                                                                                                                                                                                                                                                    |
| 42  | 21.39     | Liquiritigenin <sup>1,2</sup>            | 256.0736  | C <sub>15</sub> H <sub>12</sub> O <sub>4</sub>  | —                           | —           |                                                                                                                                                                                                                                                                                                                                                                                                                                                                                      | 255.0663                    | 0.6         | 135.0084 [M-H-C <sub>8</sub> H <sub>6</sub> O] <sup>-</sup> , 119.0509 [M-H-C <sub>7</sub> H <sub>4</sub> O <sub>3</sub> ] <sup>-</sup> , 91.0196 [M-H-C <sub>9</sub> H <sub>8</sub> O <sub>3</sub> ] <sup>-</sup>                                                                                                                                                                 |
| 43  | 21.96     | Cinnamic acid <sup>1,2</sup>             | 148.0524  | C <sub>9</sub> H <sub>8</sub> O <sub>2</sub>    | 149.0601                    | 2.4         | 131.0498 [M+H-H <sub>2</sub> O] <sup>+</sup> , 103.0552 [M+H-HCOOH] <sup>+</sup> , 77.0417 [C <sub>6</sub> H <sub>5</sub> ] <sup>+</sup> , 51.0289 [M+H-C <sub>4</sub> H <sub>4</sub> -HCOOH] <sup>+</sup>                                                                                                                                                                                                                                                                           | 147.0470                    | 12.8        | 103.0539 [M-COOH] <sup>-</sup> , 77.0383 [C <sub>6</sub> H <sub>5</sub> ] <sup>-</sup> , 61.9927                                                                                                                                                                                                                                                                                   |
| 44  | 22.89     | Timosaponin B II <sup>1,2</sup>          | 920.4981  | C <sub>45</sub> H <sub>76</sub> O <sub>19</sub> | —                           | —           |                                                                                                                                                                                                                                                                                                                                                                                                                                                                                      | 919.4932                    | 2.6         | 757.4462 [M-H-Glc] <sup>-</sup> , 595.3910 [M-H-Glc-Gal] <sup>-</sup>                                                                                                                                                                                                                                                                                                              |
| 45  | 22.93     | Xilingsaponin B                          | 902.4875  | C <sub>45</sub> H <sub>74</sub> O <sub>18</sub> | 903.4939                    | -1.0        | 741.4363 [M+H-Glc] <sup>+</sup> , 579.3856 [M+H-2Glc] <sup>+</sup> , 417.3345 [M+H-2Glc-Gal] <sup>+</sup> , 399.3247 [M+H-2Glc-Gal-H <sub>2</sub> O] <sup>+</sup> , 273.2204 [M+H-2Glc-Gal-H <sub>2</sub> O-C <sub>8</sub> H <sub>14</sub> O] <sup>+</sup> , 255.2099 [M+H-2Glc-Gal-H <sub>2</sub> O-C <sub>8</sub> H <sub>15</sub> O <sub>2</sub> ] <sup>+</sup> , 163.0804 [M+H-2Glc-Gal-H <sub>2</sub> O-C <sub>14</sub> H <sub>21</sub> O <sub>2</sub> ] <sup>+</sup> , 145.0500 | —                           | —           |                                                                                                                                                                                                                                                                                                                                                                                    |
| 46  | 24.98     | Timosaponin D                            | 918.4824  | C <sub>45</sub> H <sub>74</sub> O <sub>19</sub> | 919.4888                    | -1.0        | 757.4351 [M+H-Glc] <sup>+</sup> , 595.3837 [M+H-Glc-Gal] <sup>+</sup> , 433.3320 [M+H-Glc-Gal-Glc] <sup>+</sup> , 289.2172 [M+H-Glc-Gal-Glc-C <sub>8</sub> H <sub>14</sub> O-H <sub>2</sub> O] <sup>+</sup> , 271.2060 [M+H-Glc-Gal-Glc-C <sub>8</sub> H <sub>14</sub> O-2H <sub>2</sub> O] <sup>+</sup> , 163.0605 [M+H-Glc-Gal-Glc-C <sub>16</sub> H <sub>28</sub> O <sub>2</sub> -H <sub>2</sub> O] <sup>+</sup>                                                                  | 917.4759                    | 0.8         | 755.4307 [M-H-Glc] <sup>-</sup>                                                                                                                                                                                                                                                                                                                                                    |
| 47  | 26.54     | Genkwanin <sup>2</sup>                   | 284.0685  | C <sub>16</sub> H <sub>12</sub> O <sub>5</sub>  | —                           | —           |                                                                                                                                                                                                                                                                                                                                                                                                                                                                                      | 283.0628                    | 5.6         | 268.0386 [M-H-CH <sub>3</sub> ] <sup>-</sup> , 224.0485 [M-H-OCH <sub>3</sub> -CO] <sup>-</sup> , 211.0385, 135.0083 [M-H-C <sub>9</sub> H <sub>8</sub> O <sub>2</sub> ] <sup>-</sup> , 91.0188 [M-H-C <sub>10</sub> H <sub>8</sub> O <sub>4</sub> ] <sup>-</sup>                                                                                                                  |
| 48  | 27.10     | Glypallichalcone                         | 284.1049  | C <sub>17</sub> H <sub>16</sub> O <sub>4</sub>  | —                           | —           |                                                                                                                                                                                                                                                                                                                                                                                                                                                                                      | 283.0986                    | 3.7         | 268.0382 [M-H-CH <sub>3</sub> ] <sup>-</sup> , 221.0966 [M-H-OCH <sub>3</sub> -OCH <sub>3</sub> ] <sup>-</sup> , 133.0656 [M-H-C <sub>9</sub> H <sub>10</sub> O <sub>2</sub> ] <sup>-</sup>                                                                                                                                                                                        |
| 49  | 28.96     | Pseudoprotimosaponin AIII <sup>1,2</sup> | 902.4875  | C <sub>45</sub> H <sub>74</sub> O <sub>18</sub> | 903.4937                    | -1.2        | 741.4362 [M+H-Glc] <sup>+</sup> , 579.3856 [M+H-Glc-Gal] <sup>+</sup> , 417.3344 [M+H-Glc-Gal-Glc] <sup>+</sup> , 399.3249 [M+H-Glc-Gal-Glc-H <sub>2</sub> O] <sup>+</sup> , 273.2211 [M+H-Glc-Gal-Glc-H <sub>2</sub> O-C <sub>8</sub> H <sub>14</sub> O] <sup>+</sup> , 163.0804 [M+H-Glc-Gal-Glc-H <sub>2</sub> O-C <sub>14</sub> H <sub>21</sub> O <sub>2</sub> ] <sup>+</sup> ,                                                                                                  | 901.4811                    | 1.0         | 739.4352 [M-H-Glc] <sup>-</sup>                                                                                                                                                                                                                                                                                                                                                    |
| 50  | 30.27     | Isoliquiritigenin <sup>1,2</sup>         | 256.0736  | C <sub>15</sub> H <sub>12</sub> O <sub>4</sub>  | —                           | —           |                                                                                                                                                                                                                                                                                                                                                                                                                                                                                      | 255.0663                    | 3.0         | 135.0079 [M-H-C <sub>8</sub> H <sub>6</sub> O] <sup>-</sup> , 119.0494 [M-H-C <sub>7</sub> H <sub>4</sub> O <sub>3</sub> ] <sup>-</sup> , 91.0240 [M-H-C <sub>9</sub> H <sub>8</sub> O <sub>3</sub> ] <sup>-</sup>                                                                                                                                                                 |
| 51  | 30.38     | Formononetin <sup>2</sup>                | 268.0736  | C <sub>16</sub> H <sub>12</sub> O <sub>4</sub>  | 269.0810                    | 0.7         | 253.0512 [M-CH <sub>3</sub> ] <sup>+</sup> , 237.0542 [M-OCH <sub>3</sub> ] <sup>+</sup> , 226.0628 [M-C <sub>2</sub> H <sub>2</sub> O] <sup>+</sup> , 213.0912 [M+H-C <sub>3</sub> H <sub>4</sub> O] <sup>+</sup> , 197.0612, 181.0646, 169.0640 [M+H-CHO-2CO-CH <sub>3</sub> ] <sup>+</sup> , 118.0435 [M+H-C <sub>7</sub> H <sub>4</sub> O <sub>3</sub> -CH <sub>3</sub> ] <sup>+</sup>                                                                                           | 267.0677                    | 5.3         | 252.0424 [M-H-CH <sub>3</sub> ] <sup>-</sup> , 251.0336 [M-H-O] <sup>-</sup> , 223.0402 [M-H-O-CO] <sup>-</sup> , 195.0451 [M+H-O-2CO] <sup>-</sup> , 167.0493 [M+H-CHO-2CO-CH <sub>3</sub> ] <sup>-</sup> , 132.0218 [M-H-C <sub>7</sub> H <sub>3</sub> O <sub>3</sub> ] <sup>-</sup> , 91.0188 [M-H-C <sub>9</sub> H <sub>5</sub> O <sub>3</sub> -CH <sub>3</sub> ] <sup>-</sup> |
| 52  | 32.03     | Glabrolide <sup>2</sup>                  | 468.3240  | C <sub>30</sub> H <sub>44</sub> O <sub>4</sub>  | 469.3310                    | -0.4        | 451.3201 [M+H-H <sub>2</sub> O] <sup>+</sup> , 439.3194 [M+H-CHOH] <sup>+</sup> , 217.1597, 189.1633                                                                                                                                                                                                                                                                                                                                                                                 | —                           | —           |                                                                                                                                                                                                                                                                                                                                                                                    |
| 53  | 33.20     | Anemarrhasaponin III                     | 756.4296  | C <sub>39</sub> H <sub>64</sub> O <sub>14</sub> | —                           | —           |                                                                                                                                                                                                                                                                                                                                                                                                                                                                                      | 755.4226                    | 0.4         | 593.3697 [M-H-Glc] <sup>-</sup> , 161.0428 [C <sub>6</sub> H <sub>9</sub> O <sub>5</sub> ] <sup>-</sup>                                                                                                                                                                                                                                                                            |
| 54  | 33.33     | Anemarrhasaponin I <sup>1,2</sup>        | 758.4453  | C <sub>39</sub> H <sub>66</sub> O <sub>14</sub> | —                           | —           |                                                                                                                                                                                                                                                                                                                                                                                                                                                                                      | 757.4374                    | -0.8        | 595.3901 [M-H-Glc] <sup>-</sup> , 161.0428 [C <sub>6</sub> H <sub>9</sub> O <sub>5</sub> ] <sup>-</sup>                                                                                                                                                                                                                                                                            |
| 55  | 33.35     | Smilageninoside                          | 740.4347  | C <sub>39</sub> H <sub>64</sub> O <sub>13</sub> | 741.4407                    | -1.7        | 417.3358 [M+H-Glc-Man] <sup>+</sup> , 399.3256 [M+H-Glc-Man-H <sub>2</sub> O] <sup>+</sup> , 381.3148 [M+H-Glc-Man-2H <sub>2</sub> O] <sup>+</sup> , 271.2057 [M+H-Glc-Man-C <sub>8</sub> H <sub>18</sub> O <sub>2</sub> ] <sup>+</sup> , 253.1951 [M+H-Glc-Man-C <sub>8</sub> H <sub>18</sub> O <sub>2</sub> -H <sub>2</sub> O] <sup>+</sup> , 145.0507 [M+H-Glc-Man-C <sub>16</sub> H <sub>28</sub> O <sub>2</sub> -H <sub>2</sub> O] <sup>+</sup>                                 | —                           | —           |                                                                                                                                                                                                                                                                                                                                                                                    |
| 56  | 33.63     | Glycycomarin                             | 368.1260  | C <sub>21</sub> H <sub>20</sub> O <sub>6</sub>  | 369.1333                    | 0.0         | 313.0706 [M+H-C <sub>4</sub> H <sub>8</sub> ] <sup>+</sup> , 285.0760 [M+H-C <sub>5</sub> H <sub>9</sub> -CH <sub>3</sub> ] <sup>+</sup> , 271.0594 [M+H-C <sub>6</sub> H <sub>8</sub> -H <sub>2</sub> O] <sup>+</sup> , 243.0654 [M+H-C <sub>6</sub> H <sub>4</sub> O <sub>2</sub> -H <sub>2</sub> O] <sup>+</sup> , 211.0381                                                                                                                                                       | 367.1194                    | 1.7         | 335.0916, 309.0390, 298.0482 [M-H-C <sub>5</sub> H <sub>9</sub> ] <sup>-</sup> , 283.0228 [M-H-C <sub>5</sub> H <sub>9</sub> -CH <sub>3</sub> ] <sup>-</sup> , 255.0294 [M-H-C <sub>7</sub> H <sub>12</sub> O] <sup>-</sup>                                                                                                                                                        |
| 57  | 34.26     | Glycyrrhizic acid <sup>1,2</sup>         | 822.4038  | C <sub>42</sub> H <sub>62</sub> O <sub>16</sub> | 823.4085                    | -3.1        | 647.3766 [M+H-GlcA] <sup>+</sup> , 471.3766 [M+H-2GlcA] <sup>+</sup> , 453.3361 [M+H-2GlcA-H <sub>2</sub> O] <sup>+</sup>                                                                                                                                                                                                                                                                                                                                                            | 821.3981                    | 2.0         | 351.0576 [M-H-C <sub>30</sub> H <sub>46</sub> O <sub>4</sub> ] <sup>-</sup> , 193.0353 [C <sub>5</sub> H <sub>9</sub> O <sub>5</sub> COOH] <sup>-</sup> , 175.0251 [C <sub>5</sub> H <sub>9</sub> O <sub>4</sub> COOH] <sup>-</sup> , 113.0253 [M+H-2GlcA-C <sub>24</sub> H <sub>35</sub> O <sub>2</sub> ] <sup>-</sup>                                                            |
| 58  | 34.28     | Glycyrrhetic acid-3-O-β-D-glucuronide    | 646.3717  | C <sub>36</sub> H <sub>54</sub> O <sub>10</sub> | 647.3778                    | -1.8        | 471.3439 [M+H-C <sub>5</sub> H <sub>7</sub> COOH] <sup>+</sup> , 453.3363 [M+H-C <sub>6</sub> H <sub>9</sub> O <sub>7</sub> ] <sup>+</sup> , 435.3250 [M+H-C <sub>6</sub> H <sub>9</sub> O <sub>7</sub> -H <sub>2</sub> O] <sup>+</sup> , 407.3289 [M+H-C <sub>6</sub> H <sub>9</sub> O <sub>7</sub> -HCOOH] <sup>+</sup>                                                                                                                                                            | —                           | —           |                                                                                                                                                                                                                                                                                                                                                                                    |
| 59  | 35.15     | Timosaponin G                            | 756.4296  | C <sub>39</sub> H <sub>64</sub> O <sub>14</sub> | —                           | —           |                                                                                                                                                                                                                                                                                                                                                                                                                                                                                      | 755.4231                    | 1.0         | 593.3715 [M-H-Glc] <sup>-</sup> , 161.0455 [C <sub>6</sub> H <sub>9</sub> O <sub>5</sub> ] <sup>-</sup>                                                                                                                                                                                                                                                                            |
| 60  | 35.23     | Yamogenin                                | 414.3134  | C <sub>27</sub> H <sub>42</sub> O <sub>3</sub>  | 415.3203                    | -0.8        | 397.3093 [M+H-H <sub>2</sub> O] <sup>+</sup> , 283.2418, 271.2072 [M+H-C <sub>8</sub> H <sub>14</sub> O <sub>2</sub> ] <sup>+</sup> , 253.1952 [M+H-C <sub>11</sub> H <sub>14</sub> O] <sup>+</sup> , 159.1166, 143.0850 [M+H-C <sub>18</sub> H <sub>24</sub> O <sub>2</sub> ] <sup>+</sup> , 69.0730 [C <sub>5</sub> H <sub>9</sub> ] <sup>+</sup>                                                                                                                                  | —                           | —           |                                                                                                                                                                                                                                                                                                                                                                                    |
| 61  | 35.23     | Neogitogenin                             | 432.3240  | C <sub>27</sub> H <sub>44</sub> O <sub>4</sub>  | 433.3313                    | 0.2         | 397.3099 [M+H-H <sub>2</sub> O] <sup>+</sup> , 283.2418, 271.2073 [M+H-C <sub>8</sub> H <sub>14</sub> O <sub>2</sub> ] <sup>+</sup> , 253.1958 [M+H-C <sub>11</sub> H <sub>14</sub> O] <sup>+</sup> , 159.1177                                                                                                                                                                                                                                                                       | —                           | —           |                                                                                                                                                                                                                                                                                                                                                                                    |

Table S1. Identification of chemical profile of BHGZD *in vitro* by UFLC-Q-TOF-MS/MS.

| No. | Rt (mins) | Identification         | Mass (Da) | Formula                                         | Positive Ion ( <i>m/z</i> ) |             | Characteristic fragment ions in positive ion mode ( <i>m/z</i> )                                                                                                                                                                                                                                                                                                                                                                                                                                      | Negative Ion ( <i>m/z</i> ) |             | Characteristic fragment ions in negative ion mode ( <i>m/z</i> )                                                                                                                                                                                                                                                                                                              |
|-----|-----------|------------------------|-----------|-------------------------------------------------|-----------------------------|-------------|-------------------------------------------------------------------------------------------------------------------------------------------------------------------------------------------------------------------------------------------------------------------------------------------------------------------------------------------------------------------------------------------------------------------------------------------------------------------------------------------------------|-----------------------------|-------------|-------------------------------------------------------------------------------------------------------------------------------------------------------------------------------------------------------------------------------------------------------------------------------------------------------------------------------------------------------------------------------|
|     |           |                        |           |                                                 | Mass [M+H] <sup>+</sup>     | Error (ppm) |                                                                                                                                                                                                                                                                                                                                                                                                                                                                                                       | Mass [M-H] <sup>-</sup>     | Error (ppm) |                                                                                                                                                                                                                                                                                                                                                                               |
| 62  | 36.88     | cis-Hinokiresinol      | 252.1150  | C <sub>17</sub> H <sub>16</sub> O <sub>2</sub>  | —                           | —           |                                                                                                                                                                                                                                                                                                                                                                                                                                                                                                       | 251.1086                    | 3.3         | 235.0755 [M-H-OH] <sup>-</sup> , 157.0648 [M-H-C <sub>6</sub> H <sub>5</sub> O] <sup>-</sup> , 117.0335 [M-H-C <sub>9</sub> H <sub>10</sub> O] <sup>-</sup> , 93.0353 [M-H-C <sub>11</sub> H <sub>10</sub> O] <sup>-</sup>                                                                                                                                                    |
| 63  | 36.89     | Biochanin A            | 284.0685  | C <sub>16</sub> H <sub>12</sub> O <sub>5</sub>  | —                           | —           |                                                                                                                                                                                                                                                                                                                                                                                                                                                                                                       | 283.0628                    | 5.6         | 268.0368 [M-H-CH <sub>3</sub> ] <sup>-</sup> , 211.0388 [M-H-COH-OCH <sub>3</sub> ] <sup>-</sup> , 239.0294 [M-H-C <sub>2</sub> H <sub>3</sub> O] <sup>-</sup>                                                                                                                                                                                                                |
| 64  | 37.17     | Licoisoflavone A       | 354.1103  | C <sub>20</sub> H <sub>18</sub> O <sub>6</sub>  | 355.1179                    | 0.7         | 337.1033 [M+H-H <sub>2</sub> O] <sup>+</sup> , 201.0922 [C <sub>13</sub> H <sub>13</sub> O <sub>2</sub> ] <sup>+</sup> , 189.0924, 179.0339 [M+H-C <sub>11</sub> H <sub>12</sub> O <sub>2</sub> ] <sup>+</sup> , 151.0393, 127.0409 [C <sub>6</sub> H <sub>7</sub> O <sub>3</sub> ] <sup>+</sup> , 123.0451 [M+H-C <sub>9</sub> H <sub>5</sub> O <sub>4</sub> -C <sub>4</sub> H <sub>7</sub> ] <sup>+</sup>                                                                                           | 353.1035                    | 1.2         | 227.0706 [C <sub>14</sub> H <sub>14</sub> O <sub>3</sub> ] <sup>-</sup> , 150.0316 [M-H-C <sub>10</sub> H <sub>4</sub> O <sub>4</sub> -CH <sub>3</sub> ] <sup>-</sup> , 125.0238 [C <sub>6</sub> H <sub>5</sub> O <sub>3</sub> ] <sup>-</sup>                                                                                                                                 |
| 65  | 37.33     | Semilicoisoflavone B   | 352.0947  | C <sub>20</sub> H <sub>16</sub> O <sub>6</sub>  | 353.1018                    | -0.3        | 311.0548 [M+H-C <sub>3</sub> H <sub>6</sub> ] <sup>+</sup> , 153.0193 [M+H-C <sub>13</sub> H <sub>12</sub> O <sub>2</sub> ] <sup>+</sup>                                                                                                                                                                                                                                                                                                                                                              | 351.0875                    | 0.2         | 283.0980 [M-H-C <sub>5</sub> H <sub>9</sub> ] <sup>-</sup> , 265.0891 [C <sub>15</sub> H <sub>5</sub> O <sub>3</sub> ] <sup>-</sup> , 241.0884, 199.0768 [M-H-C <sub>7</sub> H <sub>4</sub> O <sub>4</sub> ] <sup>-</sup>                                                                                                                                                     |
| 66  | 37.63     | Timosaponin A II       | 756.4296  | C <sub>39</sub> H <sub>64</sub> O <sub>14</sub> | 757.4363                    | -0.7        | 595.3844 [M+H-Glc] <sup>+</sup> , 433.3333 [M+H-Glc-Gal] <sup>+</sup> , 289.2172 [M+H-Glc-Gal-C <sub>9</sub> H <sub>13</sub> O <sub>2</sub> ] <sup>+</sup> , 163.0616 [C <sub>6</sub> H <sub>11</sub> O <sub>5</sub> ] <sup>+</sup>                                                                                                                                                                                                                                                                   | 755.4221                    | -0.3        | 593.3731 [M-H-Glc] <sup>-</sup> , 161.0443 [C <sub>6</sub> H <sub>9</sub> O <sub>5</sub> ] <sup>-</sup>                                                                                                                                                                                                                                                                       |
| 67  | 37.67     | Diosgenin <sup>2</sup> | 414.3134  | C <sub>27</sub> H <sub>42</sub> O <sub>3</sub>  | 415.3206                    | -0.1        | 397.3090 [M+H-H <sub>2</sub> O] <sup>+</sup> , 301.2545 [M+H-C <sub>6</sub> H <sub>10</sub> O <sub>2</sub> ] <sup>+</sup> , 271.2053 [M+H-C <sub>8</sub> H <sub>16</sub> O <sub>2</sub> ] <sup>+</sup> , 253.1958 [M+H-C <sub>11</sub> H <sub>14</sub> O] <sup>+</sup> , 69.0738 [C <sub>5</sub> H <sub>9</sub> ] <sup>+</sup>                                                                                                                                                                        | —                           | —           |                                                                                                                                                                                                                                                                                                                                                                               |
| 68  | 37.67     | Markogenin             | 432.3240  | C <sub>27</sub> H <sub>44</sub> O <sub>4</sub>  | 433.3309                    | -0.8        | 289.2177 [M+H-C <sub>8</sub> H <sub>16</sub> O <sub>2</sub> ] <sup>+</sup> , 271.2053, 253.1964 [M+H-C <sub>11</sub> H <sub>14</sub> O] <sup>+</sup> , 161.1332, 145.1023 [C <sub>6</sub> H <sub>17</sub> O <sub>2</sub> ] <sup>+</sup> , 69.0738 [C <sub>5</sub> H <sub>9</sub> ] <sup>+</sup>                                                                                                                                                                                                       | —                           | —           |                                                                                                                                                                                                                                                                                                                                                                               |
| 69  | 38.11     | Licoflavonol           | 354.1103  | C <sub>20</sub> H <sub>18</sub> O <sub>6</sub>  | 355.1174                    | -0.5        | 299.0546 [M+H-C <sub>4</sub> H <sub>8</sub> ] <sup>+</sup> , 165.0209                                                                                                                                                                                                                                                                                                                                                                                                                                 | 353.1035                    | 1.2         | 297.0391 [M-H-C <sub>4</sub> H <sub>8</sub> ] <sup>-</sup> , 285.1113 [M-C <sub>5</sub> H <sub>9</sub> ] <sup>-</sup> , 151.0768 [M-H-C <sub>11</sub> H <sub>6</sub> O <sub>4</sub> ] <sup>-</sup> , 133.0286 [M-H-C <sub>12</sub> H <sub>12</sub> O <sub>4</sub> ] <sup>-</sup>                                                                                              |
| 70  | 38.27     | Glycyrrhisoflavanone   | 368.1260  | C <sub>21</sub> H <sub>20</sub> O <sub>6</sub>  | 369.1336                    | 0.9         | 313.0723 [M+H-C <sub>3</sub> H <sub>6</sub> O] <sup>+</sup> , 285.0766 [M+H-C <sub>9</sub> H <sub>6</sub> O] <sup>+</sup> , 270.0525 [M+H-C <sub>9</sub> H <sub>6</sub> O-CH <sub>3</sub> ] <sup>+</sup> , 257.0806, 243.0659, 123.0442 [M+H-C <sub>14</sub> H <sub>14</sub> O <sub>4</sub> ] <sup>+</sup>                                                                                                                                                                                            | 367.1195                    | 2.2         | 309.0406 [M-H-C <sub>3</sub> H <sub>6</sub> O] <sup>-</sup> , 297.0406 [M-H-C <sub>9</sub> H <sub>6</sub> O] <sup>-</sup> , 284.0321, 201.0184 [M-H-C <sub>8</sub> H <sub>6</sub> O <sub>4</sub> ] <sup>-</sup>                                                                                                                                                               |
| 71  | 38.42     | Uralenin               | 356.1260  | C <sub>20</sub> H <sub>20</sub> O <sub>6</sub>  | 357.1334                    | 0.3         | 301.0709 [M+H-C <sub>2</sub> H <sub>2</sub> O <sub>2</sub> ] <sup>+</sup> , 283.0596, 179.0378 [M+H-C <sub>11</sub> H <sub>14</sub> O <sub>2</sub> ] <sup>+</sup> , 175.0387, 147.0451, 153.0527 [M+H-C <sub>13</sub> H <sub>16</sub> O <sub>2</sub> ] <sup>+</sup>                                                                                                                                                                                                                                   | 355.1185                    | -0.5        | 229.0856 [M-H-C <sub>3</sub> H <sub>6</sub> -C <sub>4</sub> H <sub>4</sub> O <sub>2</sub> ] <sup>-</sup> , 174.0322, 125.0238 [C <sub>6</sub> H <sub>5</sub> O <sub>3</sub> ] <sup>-</sup>                                                                                                                                                                                    |
| 72  | 38.71     | Licoisoflavone B       | 352.0947  | C <sub>20</sub> H <sub>16</sub> O <sub>6</sub>  | 353.1023                    | 1.0         | 335.0907 [M+H-H <sub>2</sub> O] <sup>+</sup> , 311.0551 [M+H-C <sub>3</sub> H <sub>6</sub> ] <sup>+</sup> , 307.0980, 227.0706 [M+H-C <sub>6</sub> H <sub>4</sub> O <sub>2</sub> -H <sub>2</sub> O] <sup>+</sup> , 153.0188 [M+H-C <sub>13</sub> H <sub>12</sub> O <sub>2</sub> ] <sup>+</sup>                                                                                                                                                                                                        | 351.0881                    | 2.0         | 336.0603 [M-H-CH <sub>3</sub> ] <sup>-</sup> , 333.0780 [M-H-H <sub>2</sub> O] <sup>-</sup> , 321.0394 [M-H-C <sub>2</sub> H <sub>6</sub> ] <sup>-</sup>                                                                                                                                                                                                                      |
| 73  | 38.84     | Glyasperin C           | 356.1624  | C <sub>21</sub> H <sub>24</sub> O <sub>5</sub>  | 357.1699                    | 0.8         | 301.1079 [M+H-C <sub>4</sub> H <sub>8</sub> ] <sup>+</sup> , 221.1173 [M+H-C <sub>8</sub> H <sub>8</sub> O <sub>2</sub> ] <sup>+</sup> , 179.0710 [M+H-C <sub>6</sub> H <sub>5</sub> O <sub>2</sub> -C <sub>5</sub> H <sub>9</sub> ] <sup>+</sup> , 165.0559, 153.0549 [M+H-C <sub>13</sub> H <sub>16</sub> O <sub>2</sub> ] <sup>+</sup> , 137.0602 [M+H-C <sub>13</sub> H <sub>16</sub> O <sub>3</sub> ] <sup>+</sup> , 123.0451 [M+H-C <sub>14</sub> H <sub>18</sub> O <sub>3</sub> ] <sup>+</sup> | 355.1561                    | 2.7         | 323.1271 [M-H-CH <sub>3</sub> -OH] <sup>-</sup> , 233.1179 [M-H-C <sub>7</sub> H <sub>6</sub> O <sub>2</sub> ] <sup>-</sup> , 207.1014 [M-H-C <sub>9</sub> H <sub>8</sub> O <sub>2</sub> ] <sup>-</sup> , 147.0442, 135.0454 [M-H-C <sub>13</sub> H <sub>16</sub> O <sub>3</sub> ] <sup>-</sup> , 109.0307 [M-H-C <sub>15</sub> H <sub>18</sub> O <sub>3</sub> ] <sup>-</sup> |
| 74  | 39.29     | Glyasperin F           | 354.1103  | C <sub>20</sub> H <sub>18</sub> O <sub>6</sub>  | —                           | —           |                                                                                                                                                                                                                                                                                                                                                                                                                                                                                                       | 353.1040                    | 2.8         | 338.1161 [M-H-CH <sub>3</sub> ] <sup>-</sup> , 298.0449, 218.0932 [M-H-C <sub>7</sub> H <sub>3</sub> O <sub>3</sub> ] <sup>-</sup> , 151.0735 [M-H-C <sub>13</sub> H <sub>14</sub> O <sub>2</sub> ] <sup>-</sup> , 133.0636                                                                                                                                                   |
| 75  | 39.65     | Gancaonin Z            | 340.1311  | C <sub>21</sub> H <sub>24</sub> O <sub>4</sub>  | —                           | —           |                                                                                                                                                                                                                                                                                                                                                                                                                                                                                                       | 339.1246                    | 2.5         | 219.0653 [M-H-C <sub>7</sub> H <sub>4</sub> O <sub>2</sub> ] <sup>-</sup> , 183.0096, 133.0640 [C <sub>9</sub> H <sub>9</sub> O] <sup>-</sup> , 119.5000 [M-H-C <sub>9</sub> H <sub>10</sub> O <sub>2</sub> -C <sub>5</sub> H <sub>10</sub> ] <sup>-</sup>                                                                                                                    |
| 76  | 39.81     | Phaseollinisoflavan    | 324.1362  | C <sub>20</sub> H <sub>20</sub> O <sub>4</sub>  | 325.1436                    | 0.6         | 269.0754, 189.0902 [M+H-C <sub>8</sub> H <sub>8</sub> O <sub>2</sub> ] <sup>+</sup> , 171.0814 [M+H-C <sub>8</sub> H <sub>8</sub> O <sub>2</sub> -H <sub>2</sub> O] <sup>+</sup> , 123.0445 [M+H-C <sub>13</sub> H <sub>14</sub> O <sub>2</sub> ] <sup>+</sup>                                                                                                                                                                                                                                        | —                           | —           |                                                                                                                                                                                                                                                                                                                                                                               |
| 77  | 39.93     | Inflacoumarin A        | 322.1205  | C <sub>20</sub> H <sub>18</sub> O <sub>4</sub>  | —                           | —           |                                                                                                                                                                                                                                                                                                                                                                                                                                                                                                       | 321.1145                    | 3.9         | 306.0861 [M-H-CH <sub>3</sub> ] <sup>-</sup> , 175.0796 [M-H-C <sub>9</sub> H <sub>6</sub> O <sub>2</sub> ] <sup>-</sup> , 145.0270 [M-H-C <sub>11</sub> H <sub>12</sub> O <sub>2</sub> ] <sup>-</sup> , 107.0512 [M-H-C <sub>11</sub> H <sub>12</sub> O <sub>3</sub> ] <sup>-</sup>                                                                                          |
| 78  | 40.01     | Gancaonin C            | 354.1103  | C <sub>20</sub> H <sub>18</sub> O <sub>6</sub>  | 355.1174                    | -0.5        | 299.0554 [M+H-C <sub>3</sub> H <sub>4</sub> O] <sup>+</sup> , 287.0560 [M+H-C <sub>4</sub> H <sub>4</sub> O] <sup>+</sup> , 243.0695 [M+H-C <sub>6</sub> H <sub>6</sub> O-H <sub>2</sub> O] <sup>+</sup> , 69.0737 [C <sub>5</sub> H <sub>9</sub> ] <sup>+</sup>                                                                                                                                                                                                                                      | 353.1030                    | -0.2        | 297.0392 [M-H-C <sub>3</sub> H <sub>4</sub> O] <sup>-</sup> , 269.0469 [M-H-C <sub>6</sub> H <sub>8</sub> O] <sup>-</sup>                                                                                                                                                                                                                                                     |
| 79  | 40.76     | Glycyrrhisoflavone     | 354.1103  | C <sub>20</sub> H <sub>18</sub> O <sub>6</sub>  | 355.1179                    | 0.9         | 337.1070 [M+H-H <sub>2</sub> O] <sup>+</sup> , 201.0919, 189.0914 [M+H-C <sub>10</sub> H <sub>14</sub> O <sub>2</sub> ] <sup>+</sup> , 179.0344 [M+H-C <sub>11</sub> H <sub>14</sub> O <sub>2</sub> ] <sup>+</sup> , 153.0539 [M+H-C <sub>13</sub> H <sub>14</sub> O <sub>2</sub> ] <sup>+</sup> , 151.0393 [M+H-C <sub>11</sub> H <sub>18</sub> O <sub>4</sub> ] <sup>+</sup> , 123.0441 [M+H-C <sub>9</sub> H <sub>5</sub> O <sub>4</sub> -C <sub>4</sub> H <sub>7</sub> ] <sup>+</sup>             | 353.1042                    | 3.2         | 228.0772 [M-H-C <sub>6</sub> H <sub>5</sub> O <sub>3</sub> ] <sup>-</sup> , 125.0248 [M-H-C <sub>14</sub> H <sub>12</sub> O <sub>3</sub> ] <sup>-</sup> , 57.0397 [M-H-C <sub>18</sub> H <sub>16</sub> O <sub>4</sub> ] <sup>-</sup>                                                                                                                                          |
| 80  | 40.96     | Licoflavone A          | 322.1205  | C <sub>20</sub> H <sub>18</sub> O <sub>4</sub>  | —                           | —           |                                                                                                                                                                                                                                                                                                                                                                                                                                                                                                       | 321.1141                    | 2.6         | 306.0888 [M-H-CH <sub>3</sub> ] <sup>-</sup> , 261.0918, 248.0794 [M-H-C <sub>4</sub> H <sub>8</sub> -OH] <sup>-</sup> , 213.0794 [M-H-CH <sub>3</sub> -C <sub>6</sub> H <sub>5</sub> O] <sup>-</sup>                                                                                                                                                                         |
| 81  | 41.10     | Timosaponin A IV       | 740.4347  | C <sub>39</sub> H <sub>64</sub> O <sub>13</sub> | 741.4407                    | -1.8        | 579.3901 [M+H-Glc] <sup>+</sup> , 417.3374 [M+H-Glc-Man] <sup>+</sup> , 399.3266 [M+H-2Glc-Man-OH] <sup>+</sup> , 271.2072, 253.1961 [M+H-C <sub>30</sub> H <sub>48</sub> O <sub>3</sub> ] <sup>+</sup> , 145.0503 [C <sub>6</sub> H <sub>9</sub> O <sub>4</sub> ] <sup>+</sup>                                                                                                                                                                                                                       | 739.4277                    | 0.4         | 577.3766 [M-H-Glu] <sup>-</sup> , 161.0452 [C <sub>6</sub> H <sub>9</sub> O <sub>5</sub> ] <sup>-</sup>                                                                                                                                                                                                                                                                       |

Table S1. Identification of chemical profile of BHGZD *in vitro* by UFLC-Q-TOF-MS/MS.

| No. | Rt (mins) | Identification                   | Mass (Da) | Formula                                         | Positive Ion ( <i>m/z</i> ) |             | Characteristic fragment ions in positive ion mode ( <i>m/z</i> )                                                                                                                                                                                                                                                                                                                                                                                                                                                                                                                        | Negative Ion ( <i>m/z</i> ) |             | Characteristic fragment ions in negative ion mode ( <i>m/z</i> )                                                                                                                                                                                                                                                                                                                      |
|-----|-----------|----------------------------------|-----------|-------------------------------------------------|-----------------------------|-------------|-----------------------------------------------------------------------------------------------------------------------------------------------------------------------------------------------------------------------------------------------------------------------------------------------------------------------------------------------------------------------------------------------------------------------------------------------------------------------------------------------------------------------------------------------------------------------------------------|-----------------------------|-------------|---------------------------------------------------------------------------------------------------------------------------------------------------------------------------------------------------------------------------------------------------------------------------------------------------------------------------------------------------------------------------------------|
|     |           |                                  |           |                                                 | Mass [M+H] <sup>+</sup>     | Error (ppm) |                                                                                                                                                                                                                                                                                                                                                                                                                                                                                                                                                                                         | Mass [M-H] <sup>-</sup>     | Error (ppm) |                                                                                                                                                                                                                                                                                                                                                                                       |
| 83  | 41.26     | Licoricone                       | 382.1416  | C <sub>22</sub> H <sub>22</sub> O <sub>6</sub>  | 383.1493                    | 0.9         | 327.0866 [M+H-C <sub>4</sub> H <sub>7</sub> ] <sup>+</sup> , 299.0908 [M+H-C <sub>5</sub> H <sub>9</sub> -CH <sub>3</sub> ] <sup>+</sup> ,<br>191.0727 [M+H-C <sub>9</sub> H <sub>5</sub> O <sub>3</sub> -OCH <sub>3</sub> ] <sup>+</sup> , 178.0643                                                                                                                                                                                                                                                                                                                                    | 381.1347                    | 0.9         | 351.0884 [M-OCH <sub>3</sub> ] <sup>-</sup> , 323.0568                                                                                                                                                                                                                                                                                                                                |
| 84  | 41.42     | Isolicoflavonol                  | 354.1103  | C <sub>20</sub> H <sub>18</sub> O <sub>6</sub>  | 355.1178                    | 0.5         | 299.0562 [M+H-C <sub>4</sub> H <sub>8</sub> ] <sup>+</sup> , 243.0662, 217.0495 [M+H-C <sub>9</sub> H <sub>14</sub> O] <sup>+</sup> ,<br>153.0194 [M+H-C <sub>13</sub> H <sub>14</sub> O <sub>2</sub> ] <sup>+</sup> , 147.0430 [M+H-C <sub>9</sub> H <sub>5</sub> O <sub>3</sub> -CH <sub>3</sub> ] <sup>+</sup> ,<br>123.0450 [M+H-C <sub>14</sub> H <sub>16</sub> O <sub>3</sub> ] <sup>+</sup>                                                                                                                                                                                      | 353.1040                    | 2.6         | 284.0326 [M-H-C <sub>5</sub> H <sub>9</sub> ] <sup>-</sup> , 243.1010 [M-H-C <sub>7</sub> H <sub>10</sub> O] <sup>-</sup> , 216.0422,<br>201.0910 [M-H-C <sub>7</sub> H <sub>4</sub> O <sub>4</sub> ] <sup>-</sup>                                                                                                                                                                    |
| 85  | 42.91     | Timosaponin A III <sup>1,2</sup> | 740.4347  | C <sub>39</sub> H <sub>64</sub> O <sub>13</sub> | 741.4403                    | -2.3        | 579.3868 [M+H-Glc] <sup>+</sup> , 417.3369 [M+H-Glc-Gal] <sup>+</sup> ,<br>399.3255 [M+H-Glc-Gal-H <sub>2</sub> O] <sup>+</sup> , 273.2220, 255.2111 [C <sub>9</sub> H <sub>19</sub> O <sub>8</sub> ] <sup>+</sup> ,<br>163.0607 [C <sub>6</sub> H <sub>11</sub> O <sub>5</sub> ] <sup>+</sup> , 145.0502 [C <sub>6</sub> H <sub>9</sub> O <sub>4</sub> ] <sup>+</sup>                                                                                                                                                                                                                  | 739.4275                    | 0.1         | 277.3790 [M-H-Glc] <sup>-</sup> , 161.0454 [C <sub>6</sub> H <sub>9</sub> O <sub>3</sub> ] <sup>-</sup>                                                                                                                                                                                                                                                                               |
| 86  | 42.92     | Timosaponin A I                  | 578.3819  | C <sub>33</sub> H <sub>54</sub> O <sub>8</sub>  | 579.3886                    | -0.9        | 417.3375 [M+H-Glc] <sup>+</sup> , 273.2224 [M+H-C <sub>20</sub> H <sub>34</sub> O <sub>2</sub> ] <sup>+</sup> ,<br>255.2119 [C <sub>9</sub> H <sub>19</sub> O <sub>8</sub> ] <sup>+</sup>                                                                                                                                                                                                                                                                                                                                                                                               | —                           | —           |                                                                                                                                                                                                                                                                                                                                                                                       |
| 87  | 42.93     | Sarsasapogenin <sup>2</sup>      | 416.3291  | C <sub>27</sub> H <sub>44</sub> O <sub>3</sub>  | 417.3362                    | -0.3        | 273.2225 [M+H-C <sub>8</sub> H <sub>16</sub> O <sub>2</sub> ] <sup>+</sup> , 255.2121 [M+H-C <sub>8</sub> H <sub>16</sub> O <sub>2</sub> -H <sub>2</sub> O] <sup>+</sup> ,<br>173.1335, 147.1181, 145.1025 [C <sub>8</sub> H <sub>17</sub> O <sub>5</sub> ] <sup>+</sup> , 69.0740 [C <sub>8</sub> H <sub>9</sub> ] <sup>+</sup>                                                                                                                                                                                                                                                        | —                           | —           |                                                                                                                                                                                                                                                                                                                                                                                       |
| 88  | 42.94     | Licoflavone C                    | 338.1154  | C <sub>20</sub> H <sub>18</sub> O <sub>5</sub>  | —                           | —           |                                                                                                                                                                                                                                                                                                                                                                                                                                                                                                                                                                                         | 337.1094                    | 3.7         | 293.0432 [M-H-C <sub>2</sub> H <sub>4</sub> O] <sup>-</sup> , 281.0472 [M-H-C <sub>4</sub> H <sub>8</sub> ] <sup>-</sup>                                                                                                                                                                                                                                                              |
| 89  | 43.12     | Glabrocoumarin                   | 336.0998  | C <sub>20</sub> H <sub>16</sub> O <sub>5</sub>  | 337.1069                    | -0.4        | 295.0618 [M+H-C <sub>3</sub> H <sub>6</sub> ] <sup>+</sup> , 283.0625, 201.0548 [M+H-C <sub>7</sub> H <sub>4</sub> O <sub>3</sub> ] <sup>+</sup> ,<br>137.0232 [M+H-C <sub>13</sub> H <sub>12</sub> O <sub>2</sub> ] <sup>+</sup>                                                                                                                                                                                                                                                                                                                                                       | 335.0926                    | 0.4         | 320.0704 [M-H-CH <sub>3</sub> ] <sup>-</sup> , 291.1007 [M-H-CO <sub>2</sub> ] <sup>-</sup> ,<br>135.0094 [M-H-C <sub>13</sub> H <sub>12</sub> O <sub>2</sub> ] <sup>-</sup>                                                                                                                                                                                                          |
| 90  | 43.67     | Glabridin <sup>2</sup>           | 324.1363  | C <sub>20</sub> H <sub>20</sub> O <sub>4</sub>  | 325.1437                    | 0.8         | 189.0909 [M+H-C <sub>8</sub> H <sub>8</sub> O <sub>2</sub> ] <sup>+</sup> , 149.0596, 147.0800,<br>123.0453 [M+H-C <sub>13</sub> H <sub>14</sub> O <sub>2</sub> ] <sup>+</sup>                                                                                                                                                                                                                                                                                                                                                                                                          | 323.1301                    | 3.6         | 201.0895 [M-H-C <sub>7</sub> H <sub>6</sub> O <sub>2</sub> ] <sup>-</sup> , 187.0754 [M-H-C <sub>8</sub> H <sub>8</sub> O <sub>2</sub> ] <sup>-</sup> ,<br>135.0440 [M-H-C <sub>12</sub> H <sub>12</sub> O <sub>2</sub> ] <sup>-</sup> , 121.0289 [M-H-C <sub>13</sub> H <sub>14</sub> O <sub>2</sub> ] <sup>-</sup>                                                                  |
| 91  | 44.42     | Glepidotin B                     | 340.1311  | C <sub>20</sub> H <sub>20</sub> O <sub>5</sub>  | —                           | —           |                                                                                                                                                                                                                                                                                                                                                                                                                                                                                                                                                                                         | 339.1249                    | 3.3         | 219.0651 [M-H-C <sub>8</sub> H <sub>8</sub> O <sub>2</sub> ] <sup>-</sup> , 119.0504 [M-H-C <sub>12</sub> H <sub>12</sub> O <sub>4</sub> ] <sup>-</sup>                                                                                                                                                                                                                               |
| 92  | 44.76     | Gancaonin A                      | 352.1311  | C <sub>21</sub> H <sub>20</sub> O <sub>5</sub>  | 353.1386                    | 0.6         | 189.0901 [M+H-C <sub>4</sub> H <sub>8</sub> -C <sub>7</sub> H <sub>8</sub> O] <sup>+</sup> , 177.0585 [M+H-C <sub>11</sub> H <sub>12</sub> O <sub>2</sub> ] <sup>+</sup> ,<br>171.0816, 153.0556 [M+H-C <sub>12</sub> H <sub>8</sub> O <sub>3</sub> ] <sup>+</sup> , 147.0803 [M+H-C <sub>12</sub> H <sub>14</sub> O <sub>3</sub> ] <sup>+</sup>                                                                                                                                                                                                                                        | —                           | —           |                                                                                                                                                                                                                                                                                                                                                                                       |
| 93  | 44.88     | Glepidotin A                     | 338.1154  | C <sub>20</sub> H <sub>18</sub> O <sub>5</sub>  | —                           | —           |                                                                                                                                                                                                                                                                                                                                                                                                                                                                                                                                                                                         | 337.1100                    | 5.6         |                                                                                                                                                                                                                                                                                                                                                                                       |
| 94  | 46.12     | Glycyrrin                        | 382.1416  | C <sub>22</sub> H <sub>22</sub> O <sub>6</sub>  | 383.1489                    | 0.0         | 299.0912 [M+H-C <sub>5</sub> H <sub>9</sub> -CH <sub>3</sub> ] <sup>+</sup> , 284.0677 [M+H-C <sub>5</sub> H <sub>9</sub> -CH <sub>3</sub> -CH <sub>3</sub> ] <sup>+</sup>                                                                                                                                                                                                                                                                                                                                                                                                              | —                           | —           |                                                                                                                                                                                                                                                                                                                                                                                       |
| 95  | 47.55     | Glabrone <sup>2</sup>            | 336.0998  | C <sub>20</sub> H <sub>16</sub> O <sub>5</sub>  | 337.1073                    | 0.8         | 295.0616 [M+H-C <sub>3</sub> H <sub>6</sub> ] <sup>+</sup> , 153.0185 [M+H-C <sub>11</sub> H <sub>14</sub> O <sub>3</sub> ] <sup>+</sup>                                                                                                                                                                                                                                                                                                                                                                                                                                                | 335.0934                    | 2.7         | 319.0615 [M-H-OH] <sup>-</sup> , 305.0464 [M-H-C <sub>2</sub> H <sub>6</sub> ] <sup>-</sup>                                                                                                                                                                                                                                                                                           |
| 96  | 47.72     | Glyasperin B                     | 370.1416  | C <sub>21</sub> H <sub>22</sub> O <sub>6</sub>  | 371.1490                    | 0.2         | 315.0870 [M+H-C <sub>4</sub> H <sub>7</sub> ] <sup>+</sup> , 297.0753 [M+H-C <sub>4</sub> H <sub>7</sub> -OH] <sup>+</sup> ,<br>193.0475 [M+H-C <sub>5</sub> H <sub>9</sub> -C <sub>6</sub> H <sub>5</sub> O <sub>2</sub> ] <sup>+</sup> , 123.0444 [C <sub>7</sub> H <sub>6</sub> O <sub>2</sub> ] <sup>+</sup>                                                                                                                                                                                                                                                                        | 369.1349                    | 1.4         | 207.1000 [C <sub>12</sub> H <sub>15</sub> O <sub>3</sub> ] <sup>-</sup> , 192.0773,<br>161.0234 [M-H-C <sub>5</sub> H <sub>9</sub> -OCH <sub>3</sub> -C <sub>6</sub> H <sub>5</sub> O <sub>2</sub> ] <sup>-</sup> ,<br>149.0220 [M-H-C <sub>13</sub> H <sub>16</sub> O <sub>3</sub> ] <sup>-</sup> , 137.0223 [C <sub>8</sub> H <sub>9</sub> O <sub>2</sub> ] <sup>-</sup> , 124.0156 |
| 97  | 48.26     | Gancaonin B                      | 368.1260  | C <sub>21</sub> H <sub>20</sub> O <sub>6</sub>  | 369.1332                    | -0.2        | 313.0701 [M+H-C <sub>4</sub> H <sub>7</sub> ] <sup>+</sup> , 295.0582 [M+H-C <sub>4</sub> H <sub>7</sub> -OH] <sup>+</sup> ,<br>179.0338 [M+H-C <sub>5</sub> H <sub>9</sub> -C <sub>7</sub> H <sub>7</sub> O <sub>2</sub> ] <sup>+</sup> , 149.0239 [M+H-C <sub>12</sub> H <sub>12</sub> O <sub>4</sub> ] <sup>+</sup>                                                                                                                                                                                                                                                                  | —                           | —           |                                                                                                                                                                                                                                                                                                                                                                                       |
| 98  | 48.38     | Licoagroisoflavone               | 336.0998  | C <sub>20</sub> H <sub>16</sub> O <sub>5</sub>  | 337.1074                    | 1.1         | 321.0742 [M+H-CH <sub>3</sub> ] <sup>+</sup> , 319.0999 [M+H-OH] <sup>+</sup>                                                                                                                                                                                                                                                                                                                                                                                                                                                                                                           | —                           | —           |                                                                                                                                                                                                                                                                                                                                                                                       |
| 99  | 48.53     | Glyasperin D                     | 370.1780  | C <sub>22</sub> H <sub>26</sub> O <sub>5</sub>  | 371.1856                    | 0.8         | 315.1242 [M+H-C <sub>4</sub> H <sub>7</sub> ] <sup>+</sup> , 303.1232 [M+H-C <sub>4</sub> H <sub>7</sub> -CH <sub>3</sub> ] <sup>+</sup> ,<br>235.1339 [M+H-C <sub>8</sub> H <sub>8</sub> O <sub>2</sub> ] <sup>+</sup> , 193.0857 [M+H-C <sub>4</sub> H <sub>7</sub> -CH <sub>3</sub> -C <sub>6</sub> H <sub>5</sub> O <sub>2</sub> ] <sup>+</sup> ,<br>181.0859, 167.0713 [M+H-C <sub>13</sub> H <sub>16</sub> O <sub>2</sub> ] <sup>+</sup> ,<br>123.0453 [M+H-C <sub>15</sub> H <sub>20</sub> O <sub>3</sub> ] <sup>+</sup> , 69.0737 [C <sub>5</sub> H <sub>9</sub> ] <sup>+</sup> | 369.1719                    | 3.1         | 217.0826 [M-H-C <sub>8</sub> H <sub>8</sub> O <sub>3</sub> ] <sup>-</sup> , 147.0443,<br>135.0434 [M-H-C <sub>14</sub> H <sub>18</sub> O <sub>3</sub> ] <sup>-</sup>                                                                                                                                                                                                                  |
| 100 | 49.00     | Anemarrhenasaponin Ia            | 772.4609  | C <sub>46</sub> H <sub>68</sub> O <sub>14</sub> | —                           | —           |                                                                                                                                                                                                                                                                                                                                                                                                                                                                                                                                                                                         | 771.4445                    | -11.8       | 725.4410 [M-H-CH <sub>2</sub> OH-CH <sub>3</sub> ] <sup>-</sup> , 563.3923 [M-H-Glc-OCH <sub>3</sub> ] <sup>-</sup>                                                                                                                                                                                                                                                                   |
| 101 | 52.74     | Glyurallin A                     | 352.1311  | C <sub>21</sub> H <sub>20</sub> O <sub>5</sub>  | 353.1383                    | 0.0         | 297.0762 [M+H-C <sub>4</sub> H <sub>7</sub> ] <sup>+</sup> , 267.0630 [M+H-C <sub>4</sub> H <sub>7</sub> -OCH <sub>3</sub> ] <sup>+</sup>                                                                                                                                                                                                                                                                                                                                                                                                                                               | —                           | —           |                                                                                                                                                                                                                                                                                                                                                                                       |
| 102 | 52.79     | β-Glycyrrhetic acid <sup>2</sup> | 470.3396  | C <sub>30</sub> H <sub>46</sub> O <sub>4</sub>  | 471.3468                    | -0.2        | 425.3403 [M+H-COOH] <sup>+</sup> , 407.3302 [M+H-COOH-OH] <sup>+</sup> ,<br>317.2114 [M+H-C <sub>10</sub> H <sub>18</sub> O] <sup>+</sup> , 235.1708 [M+H-C <sub>15</sub> H <sub>24</sub> O <sub>2</sub> ] <sup>+</sup> ,<br>189.1649 [M+H-C <sub>15</sub> H <sub>24</sub> O <sub>2</sub> -COOH] <sup>+</sup>                                                                                                                                                                                                                                                                           | 469.3327                    | 0.8         | 425.3410 [M-H-COOH] <sup>-</sup> , 355.2645 [M-H-C <sub>6</sub> H <sub>10</sub> O <sub>2</sub> ] <sup>-</sup>                                                                                                                                                                                                                                                                         |
| 103 | 69.00     | Stigmasterol                     | 412.3705  | C <sub>29</sub> H <sub>48</sub> O               | 413.3810                    | 7.8         | 367.3759 [M+H-OH-C <sub>2</sub> H <sub>5</sub> ] <sup>+</sup> , 350.3483, 301.1405 [M+H-C <sub>8</sub> H <sub>16</sub> ] <sup>+</sup> ,<br>69.0743 [C <sub>5</sub> H <sub>9</sub> ] <sup>+</sup>                                                                                                                                                                                                                                                                                                                                                                                        | —                           | —           |                                                                                                                                                                                                                                                                                                                                                                                       |
