# Supplementary material for: Metabolic profiling and pharmacokinetic studies of Baihu-Guizhi decoction in rats by UFLC-Q-TOF–MS/MS and UHPLC-Q-TRAP-MS/MS
Source: PubMed Central journal article supplement (PMC9531372; doi:10.1186/s13020-022-00665-w), 2022-10-04
Supplement: 13020_2022_665_MOESM6_ESM.pdf [file 13020_2022_665_MOESM6_ESM.pdf]

Table S2 Quantification analysis of calcium in Gypsum Fibrosum and full prescription BHGZD by ICP-AES.

| Sample          | Concentration of calcium<br>(n=2, Mean $\pm$ SD, $\mu\text{g/mL}$ ) | Normalized Concentration<br>( $\mu\text{g/mL}$ ) | Final Concentration of calcium <sup>a</sup><br>( $\mu\text{g/mL}$ ) |
|-----------------|---------------------------------------------------------------------|--------------------------------------------------|---------------------------------------------------------------------|
| Blank           | 0.716 $\pm$ 0.04                                                    | -                                                | -                                                                   |
| Gypsum Fibrosum | 6.255 $\pm$ 0.15                                                    | 5.539                                            | 553.9                                                               |
| BHGZD           | 8.980 $\pm$ 0.41                                                    | 8.264                                            | 826.4                                                               |

a. Sample preparation: Gypsum Fibrosum solution or full prescription BHGZD diluted 100x before ICP-AES detection.
